# Supplementary material for: Genetic sequencing for surveillance of drug resistance in tuberculosis in highly endemic countries: a multi-country population-based surveillance study
Source: PubMed Central journal article supplement (PMC5968368; doi:10.1016/s1473-3099(18)30073-2), 2018-06
Supplement: mmc1.pdf [file mmc1.pdf]

# THE LANCET Infectious Diseases

## Supplementary webappendix

This webappendix formed part of the original submission and has been peer reviewed. We post it as supplied by the authors.

Supplement to: Zignol M, Cabibbe AM, Dean AS, et al. Genetic sequencing for surveillance of drug resistance in tuberculosis in highly endemic countries: a multi-country population-based surveillance study. *Lancet Infect Dis* 2018; published online March 21. [http://dx.doi.org/10.1016/S1473-3099\(18\)30073-2](http://dx.doi.org/10.1016/S1473-3099(18)30073-2).

## **Appendix: Genetic sequencing for surveillance of drug resistance in tuberculosis in highly endemic countries: a multi-country population-based study**

### **Methods**

#### Phenotypic testing

Identification of *M. tuberculosis* complex was performed using biochemical and immunochromatographic tests <sup>1</sup>. Susceptibility testing was conducted using the Löwenstein-Jensen (LJ) proportion method or BACTEC MGIT 960 (Becton Dickinson, Sparks, MD, USA) with 1% as the critical proportion (for details by country see supplement Table 1, Appendix, page 7) according to manufacturers' instructions, at the following critical concentrations recommended by the World Health Organization for LJ and MGIT 960, respectively <sup>2</sup>: rifampicin, 40.0 µg/mL and 1.0 µg/mL; isoniazid, 0.2 µg/mL and 0.1 µg/mL; pyrazinamide, 100.0 µg/mL (MGIT 960); ofloxacin, 4.0 µg/mL and 2.0 µg/mL; moxifloxacin, 0.5 µg/mL (MGIT 960); kanamycin, 30.0 µg/mL and 2.5 µg/mL; amikacin, 30.0 µg/mL and 1.0 µg/mL; capreomycin, 40.0 µg/mL and 2.5 µg/mL. Strains showing discrepant results between *pncA* sequencing and phenotypic testing of pyrazinamide in MGIT 960 were additionally tested using the Wayne enzymatic pyrazinamidase assay. The pyrazinamidase assay was performed as described by Wayne, with slight modifications as previously published <sup>3</sup>.

#### DNA extraction

To extract and purify high-quality genomic DNA for next generation sequencing, commercially available (para)magnetic- (Maxwell 16 Cell DNA Purification kit, Promega, Madison, WI, USA; NucliSENS easyMag, Biomerieux, Marcy l'Etoile, France), and column-based (QIAamp DNA Mini Kit, Qiagen, Hilden, Germany) systems, or CTAB (N-cetyl-N,N,N-trimethyl ammonium bromide)/NaCl protocol were used according to manufacturer's instructions and published procedures <sup>4,5</sup>. When Sanger sequencing was used, DNA was extracted from pure cultures by thermal lysis and sonication as described elsewhere <sup>6</sup>.

## DNA sequencing

Three different technologies were used for DNA sequencing.

1. Illumina technology (Illumina Inc., San Diego, CA, USA). Paired-end libraries were prepared using the Nextera XT DNA Sample Preparation kit and sequenced on the HiSeq 2500, NextSeq 500 and MiSeq platforms (reads length 101 bp, 151 bp and 251 bp, respectively), according to the manufacturer's instructions.
2. Ion PGM technology (Thermo Fisher Scientific Inc., Waltham, MA, USA). Library and emulsion PCR were performed following manufacturer's instructions (reads length: 400 bp).

The reads generated with these two next generation sequencing technologies were checked for quality and aligned to *M. tuberculosis* H37Rv reference genome (GenBank AL123456.3). In particular, total variant calling was performed by using the CLC Genomics Workbench 7 tool (Qiagen, Hilden, Germany) for Ion PGM technology with the following filters: minimum reads coverage: 10, minimum count of reads calling variants: 2, minimum frequency of reads calling variants: 10%, minimum frequency of reads calling variants in each direction: 5%. Pyro-error variants in homopolymer regions with a minimum length of 3 and a frequency below 0.8 were removed. A published on-line analysis pipeline was applied to ensure quality of variant calls for sequences generated by Illumina technology <sup>7</sup> with the following checks: no unusual depth (>2× compared to average coverage), no additional variant calls within 12 base pairs of another SNP or indel, at least 5 reads calling variants, consensus on >75% reads including at least one read for each direction. In addition, a standardized analysis pipeline developed by the laboratories participating in the study was used to confirm and cross-check the results. A package of bioinformatics software was used for recalibration, indels realignment and variant calling with the following filters: 4 reads covering each direction, a total of 4 reads with a phred score greater or equal to 20 and allele frequency greater or equal to 75%. Moreover, in the event of doubtful calls, reads mapping to the reference genome were visually inspected. When analysis of at least the targeted genomic regions was not possible due to low

quality or insufficient reads coverage of sequencing results, the test was repeated or the sample excluded.

3. Sanger technology (Thermo Fisher Scientific Inc.) The relevant genomic regions of *rpoB*, *katG*, *fabG* promoter, *inhA*, *pncA*, *gyrA* and *gyrB* were targeted<sup>8</sup>. The primers used are reported in Supplement Table 2. PCR products were sequenced using 3730xl platform (Thermo Fisher Scientific Inc.), according to manufacturer's instructions.

The output results were assembled and analysed using ClustalW application (BioEdit software, Ibis Biosciences, Abbott Company, Carlsbad, CA, USA) and Sequencher software (Sequencher version 4.9 DNA sequence analysis software, Gene Codes Corporation, Ann Arbor, MI USA). Sequences were aligned to the *M. tuberculosis* H37Rv reference strain (GenBank AL123456.3) to identify nucleotide mutations. Chromatograms with poor quality were re-sequenced and were re-analyzed if the reads improved. Any discordant results were re-analyzed.

Nucleotide variants detected by the different sequencing technologies were annotated based on the *M. tuberculosis* H37Rv reference genome. Mutations in *gyrB* gene were reported according to the annotation proposed by Camus et al, locating the Quinolone Resistance-Determining Region (QRDR) between codons 461 and 499<sup>9</sup>.

The role of variants detected within the targeted genomic regions was assigned according to the recently developed, first-ever standardized approach for the grading of mutations in *M. tuberculosis* according to their association with drug resistance<sup>10</sup>. Specifically, a standardised procedure for grading drug resistance-associated mutations based on positive likelihood ratios (LR) and thresholds commonly adopted in evidence-based medicine was used for objectively evaluating whether mutations were positively or negatively associated with phenotypic resistance. Using this rationale, mutations were graded as having either "high" ( $p < 0.05$ ,  $LR > 10$ ), "moderate" ( $p < 0.05$ ,  $5 < LR \leq 10$ ) or "minimal" confidence ( $p < 0.05$ ,  $1 < LR \leq 5$ ) of being associated with resistance, or as "not associated with resistance" ( $p < 0.05$ ,  $LR < 1$ ) or as "indeterminate" ( $p \geq 0.05$ ). In addition, systematic reviews and available databases were used to infer the role of mutations not classified with the grading system

and for substitutions not linked to resistance <sup>7, 8, 11, 12, 13, 14, 15</sup>.

In accordance with the abovementioned approach described by Miotto *et al.* <sup>10</sup>, mutations classified as having high, moderate, and minimal confidence were assumed as true markers of resistance, overruling the phenotypic result whenever such mutations were observed.

## **Results**

### Quality of sequencing results

A reads coverage relative to the reference genome of 69.2x was obtained on average from samples undergoing whole genome sequencing, with a mean percentage of unambiguous coverage relative to the complete reference genome of 96%. Specifically, more than 95% of whole genome sequenced samples achieved a reads coverage of at least 20x, as minimum threshold accepted to analyse results with high accuracy (and 86% of these achieved more than 30x). Considering the two different next generation sequencing technologies used, a 30x mean coverage was achieved, at least, from both.

## References

- 1 Kent P, Kubica G. Public health mycobacteriology: a guide for the level III laboratory. U.S Dept of Health and Human Services. Public Health Service, Centers for Disease Control, Atlanta, GA, USA. 1985.
- 2 Updated interim critical concentrations for first-line and second-line DST. Geneva, World Health Organization, 2012.
- 3 Singh P, Wesley C, Jadaun GPS, *et al.* Comparative evaluation of Löwenstein-Jensen proportion method, BacT/ALERT 3D system, and enzymatic pyrazinamidase assay for pyrazinamide susceptibility testing of Mycobacterium tuberculosis. *J Clin Microbiol* 2007; **45**: 76–80.
- 4 Käser M, Ruf M-T, Hauser J, Marsollier L, Pluschke G. Optimized method for preparation of DNA from pathogenic and environmental mycobacteria. *Appl Environ Microbiol* 2009; **75**: 414–8.
- 5 Köser CU, Bryant JM, Becq J, *et al.* Whole-genome sequencing for rapid susceptibility testing of M. tuberculosis. *N Engl J Med* 2013; **369**: 290–2.
- 6 Zwadyk P, Down JA, Myers N, Dey MS. Rendering of mycobacteria safe for molecular diagnostic studies and development of a lysis method for strand displacement amplification and PCR. *J Clin Microbiol* 1994; **32**: 2140–6.
- 7 Feuerriegel S, Schleusener V, Beckert P, *et al.* PhyResSE: a Web Tool Delineating Mycobacterium tuberculosis Antibiotic Resistance and Lineage from Whole-Genome Sequencing Data. *J Clin Microbiol* 2015; **53**: 1908–14.
- 8 Zhang Y, Yew W-W. Mechanisms of drug resistance in Mycobacterium tuberculosis: update 2015. *Int J Tuberc Lung Dis* 2015; **19**: 1276–89.
- 9 Camus J-C, Pryor MJ, Médigue C, Cole ST. Re-annotation of the genome sequence of Mycobacterium tuberculosis H37Rv. *Microbiology (Reading, Engl)* 2002; **148**: 2967–73.
- 10 Miotto P, Tessema B, Tagliani E, *et al.* A standardised method for interpreting the association between mutations and phenotypic drug resistance in Mycobacterium tuberculosis. *Eur Respir J* 2017; **50**. DOI:10.1183/13993003.01354-2017.
- 11 Salamon H, Yamaguchi KD, Cirillo DM, *et al.* Integration of published information into a resistance-associated mutation database for Mycobacterium tuberculosis. *J Infect Dis* 2015; **211 Suppl 2**: S50-57.
- 12 Coll F, McNerney R, Guerra-Assunção JA, *et al.* A robust SNP barcode for typing Mycobacterium tuberculosis complex strains. *Nat Commun* 2014; **5**: 4812.
- 13 Avalos E, Catanzaro D, Catanzaro A, *et al.* Frequency and geographic distribution of gyrA and gyrB mutations associated with fluoroquinolone resistance in clinical Mycobacterium tuberculosis isolates: a systematic review. *PLoS ONE* 2015; **10**: e0120470.
- 14 Sandgren A, Strong M, Muthukrishnan P, Weiner BK, Church GM, Murray MB. Tuberculosis drug resistance mutation database. *PLoS Med* 2009; **6**: e2.

15 Broad Institute - Tuberculosis Drug Resistance Mutation Database.  
[http://www.broadinstitute.org/annotation/genome/mtb\\_drug\\_resistance.1/DirectedSequencingHome.html](http://www.broadinstitute.org/annotation/genome/mtb_drug_resistance.1/DirectedSequencingHome.html) (accessed December 29, 2017). .

## Supplement Tables

Supplement Table 1. Laboratory methods for isolation of *M. tuberculosis*, phenotypic susceptibility testing and sequencing by country.

| Country      | Number of isolates | Isolation of <i>M. tuberculosis</i> and phenotypic susceptibility testing |                                                                       | Sequencing method              |
|--------------|--------------------|---------------------------------------------------------------------------|-----------------------------------------------------------------------|--------------------------------|
|              |                    | Löwenstein-Jensen                                                         | MGIT 960                                                              |                                |
| Azerbaijan   | 751                | <i>M.tb</i> isolation, DST to: RIF, INH                                   | DST to: OFX, MFX, PZA, AMK, CAP                                       | WGS using Illumina             |
| Bangladesh   | 949                | <i>M.tb</i> isolation, DST to: RIF, INH                                   | DST to: OFX, MFX, PZA, KAN                                            | WGS using Illumina             |
| Belarus      | 197                |                                                                           | <i>M.tb</i> isolation, DST to: RIF, INH, OFX, MFX, PZA, KAN, AMK, CAP | WGS using Ion PGM              |
| Pakistan     | 1,461              | <i>M.tb</i> isolation, DST to: RIF, INH                                   | DST to: OFX, MFX, PZA, KAN, CAP                                       | Sanger or WGS using Illumina * |
| Philippines  | 1,017              | <i>M.tb</i> isolation, DST to: RIF, INH                                   |                                                                       | Sanger                         |
| South Africa | 1,578              |                                                                           | <i>M.tb</i> isolation, DST to: RIF, INH, OFX, MFX, PZA, KAN, AMK, CAP | WGS using Illumina             |
| Ukraine      | 1,141              | <i>M.tb</i> isolation, DST to: RIF, INH, OFX, KAN, AMK, CAP               | DST to: MFX                                                           | WGS using Illumina             |

LJ: Löwenstein-Jensen; DST: drug susceptibility testing; RIF: rifampicin; INH: isoniazid; OFX: ofloxacin; MFX: moxifloxacin; PZA: pyrazinamide; KAN: kanamycin; AMK: amikacin; CAP: capreomycin; WGS: whole genome sequencing.

\* of the 1,461 isolates from Pakistan, 1,254 underwent Sanger sequencing and the remaining 207 underwent WGS using Illumina

Supplement Table 2. List of primers used for amplification of the genomic regions sequenced by Sanger technique.

| Drug resistance  | Locus tag          | Gene ID                | Forward primer sequence  | Reverse primer sequence | Length (bp) |
|------------------|--------------------|------------------------|--------------------------|-------------------------|-------------|
|                  |                    |                        | (5'-3')                  | (5'-3')                 |             |
| Pyrazinamide     | Rv2043c + promoter | <i>pncA</i>            | GCTGGTCATGTTTCGCGATCG    | CAGGAGCTGCAAACCAACTCG   | 664         |
| Fluoroquinolones | Rv0006             | <i>gyrA</i> QRDR       | GATGACAGACACGACGTTGC     | GGGCTTCGGTGTACCTCAT     | 398         |
| Fluoroquinolones | Rv0005             | <i>gyrB</i> QRDR       | GTCGTTGTGAACAAGGCTGTG    | GTGGAAATATGTTGGCCGTC    | 413         |
| Rifampicin       | Rv0667             | <i>rpoB</i> hotspot    | GGGAGCGGATGACCACCCA      | GCGGTACGGCGTTTCGATGAAC  | 350         |
| Rifampicin       | Rv0667             | <i>rpoB</i> N-terminal | CGACGAGTGCAAAGACAAGGACA  | GACGGTGTGCGCTTGTGCGAC   | 310         |
| Isoniazid        | Rv1908c            | <i>katG</i> codon 315  | CGGCGCATGGCCATGAACGACGTC | CCGGCACCGGCGCCGTCCTTG   | 329         |
| Isoniazid        | Rv1484             | <i>inhA</i>            | CTATATCTCCGGTGC GGTCAT   | TCGGGCCCTTCCGGTC        | 941         |
| Isoniazid        | Rv1483 promoter    | <i>fabG</i> promoter   | CGAAGTGTGCTGAGTCACACCG   | CGATCCCCCGGTTTCCTCCG    | 219         |

QRDR: quinolone resistance-determining region.

Supplement Table 3. Number of clinical *M. tuberculosis* isolates included in the study and the pooled sensitivity values stratified by rifampicin resistance status for each respective locus or loci.

| Drug          | Locus                  | Country      | RIF-susceptible cases |                       | RIF-resistant cases |                       | All cases       |                       |
|---------------|------------------------|--------------|-----------------------|-----------------------|---------------------|-----------------------|-----------------|-----------------------|
|               |                        |              | no. of isolates       | sensitivity % (95%CI) | no. of isolates     | sensitivity % (95%CI) | no. of isolates | sensitivity % (95%CI) |
| rifampicin    | <i>rpoB</i>            | Azerbaijan   | -                     | -                     | -                   | -                     | 745             | 95 (90-98)            |
|               |                        | Bangladesh   | -                     | -                     | -                   | -                     | 941             | 86 (76-93)            |
|               |                        | Belarus      | -                     | -                     | -                   | -                     | 191             | 93 (86-97)            |
|               |                        | Pakistan     | -                     | -                     | -                   | -                     | 1,455           | 85 (76-91)            |
|               |                        | Philippines  | -                     | -                     | -                   | -                     | 1,003           | 89 (81-95)            |
|               |                        | South Africa | -                     | -                     | -                   | -                     | 1,535           | 87 (79-94)            |
|               |                        | Ukraine      | -                     | -                     | -                   | -                     | 1,140           | 94 (91-96)            |
| isoniazid     | <i>katG &amp; inhA</i> | Azerbaijan   | 616                   | 81 (72-88)            | 129                 | 85 (78-90)            | 745             | 83 (78-88)            |
|               |                        | Bangladesh   | 871                   | 94 (82-99)            | 70                  | 84 (73-92)            | 941             | 88 (81-93)            |
|               |                        | Belarus      | 97                    | 90 (70-99)            | 94                  | 99 (94-100)           | 191             | 97 (93-99)            |
|               |                        | Pakistan     | 1,353                 | 65 (56-73)            | 99                  | 75 (65-83)            | 1,452           | 69 (62-75)            |
|               |                        | Philippines  | 937                   | 80 (72-87)            | 76                  | 90 (80-96)            | 1,013           | 84 (78-89)            |
|               |                        | South Africa | 1,464                 | 48 (37-59)            | 76                  | 84 (72-93)            | 1,540           | 62 (54-70)            |
|               |                        | Ukraine      | 781                   | 92 (86-96)            | 355                 | 97 (95-98)            | 1,136           | 96 (93-97)            |
| ofloxacin     | <i>gyrA &amp; gyrB</i> | Azerbaijan   | 615                   | 67 (9-99)             | 130                 | 85 (69-95)            | 745             | 84 (68-94)            |
|               |                        | Bangladesh   | 860                   | 95 (84-99)            | 68                  | 100 (71-100)          | 928             | 96 (87-100)           |
|               |                        | Belarus      | 97                    | 0 (0-85)              | 93                  | 93 (76-99)            | 190             | 87 (69-96)            |
|               |                        | Pakistan     | 511                   | 73 (65-81)            | 96                  | 86 (65-97)            | 607             | 75 (68-82)            |
|               |                        | South Africa | 1,426                 | 50 (1-99)             | 77                  | 83 (52-98)            | 1,503           | 79 (49-95)            |
|               |                        | Ukraine      | 782                   | 83 (36-100)           | 355                 | 90 (80-96)            | 1,137           | 89 (80-95)            |
| moxifloxacin  | <i>gyrA &amp; gyrB</i> | Azerbaijan   | 615                   | 100 (15-100)          | 130                 | 88 (72-97)            | 745             | 89 (73-97)            |
|               |                        | Bangladesh   | 860                   | 98 (87-100)           | 68                  | 100 (71-100)          | 928             | 98 (90-100)           |
|               |                        | Belarus      | 97                    | 0 (0-85)              | 93                  | 89 (71-96)            | 190             | 83 (64-94)            |
|               |                        | Pakistan     | 511                   | 80 (72-87)            | 96                  | 95 (75-100)           | 607             | 82 (75-89)            |
|               |                        | South Africa | 1,416                 | 50 (1-99)             | 77                  | 91 (59-100)           | 1,493           | 85 (55-98)            |
|               |                        | Ukraine      | 555                   | 100 (48-100)          | 275                 | 92 (82-98)            | 830             | 93 (83-98)            |
| pyrazinamide  | <i>pncA</i>            | Azerbaijan   | 616                   | 58 (28-85)            | 129                 | 54 (43-65)            | 745             | 55 (44-65)            |
|               |                        | Bangladesh   | 49                    | 31 (11-59)            | 24                  | 40 (19-64)            | 73              | 36 (21-54)            |
|               |                        | Belarus      | 99                    | 75 (19-99)            | 98                  | 83 (72-90)            | 197             | 82 (72-90)            |
|               |                        | Pakistan     | 98                    | 25 (3-65)             | 46                  | 35 (20-54)            | 144             | 33 (20-50)            |
|               |                        | South Africa | 1,477                 | 24 (11-41)            | 76                  | 64 (45-80)            | 1,553           | 43 (31-56)            |
|               |                        | Ukraine      | -                     | -                     | 281                 | 48 (40-55)            | -               | -                     |
| pyrazinamide* | <i>pncA</i>            | Azerbaijan   | 616                   | 70 (35-93)            | 129                 | 54 (43-65)            | 745             | 56 (45-66)            |
|               |                        | Bangladesh   | 49                    | 33 (12-62)            | 24                  | 38 (18-62)            | 73              | 36 (21-54)            |
|               |                        | Belarus      | 99                    | 75 (19-99)            | 98                  | 81 (71-89)            | 197             | 81 (71-89)            |
|               |                        | Pakistan     | 98                    | 29 (4-71)             | 46                  | 36 (20-55)            | 144             | 35 (21-52)            |
|               |                        | South Africa | 1,477                 | 57 (29-82)            | 76                  | 60 (42-76)            | 1,553           | 59 (44-73)            |
|               |                        | Ukraine      | -                     | -                     | 281                 | 48 (40-55)            | -               | -                     |
| kanamycin     | <i>rrs &amp; eis</i>   | Belarus      | -                     | -                     | 97                  | 89 (73-97)            | -               | -                     |
|               |                        | Pakistan     | -                     | -                     | 74                  | 100 (15-100)          | -               | -                     |
|               |                        | South Africa | -                     | -                     | 83                  | 100 (15-100)          | -               | -                     |
|               |                        | Ukraine      | -                     | -                     | 369                 | 67 (58-75)            | -               | -                     |
|               |                        | Azerbaijan   | -                     | -                     | 140                 | 86 (71-95)            | -               | -                     |
| amikacin      | <i>rrs</i>             | Belarus      | -                     | -                     | 97                  | 92 (74-99)            | -               | -                     |
|               |                        | South Africa | -                     | -                     | 84                  | 67 (9-99)             | -               | -                     |
|               |                        | Ukraine      | -                     | -                     | 369                 | 95 (86-99)            | -               | -                     |
|               |                        | Azerbaijan   | -                     | -                     | 141                 | 80 (65-91)            | -               | -                     |
| capreomycin   | <i>rrs</i>             | Belarus      | -                     | -                     | 97                  | 96 (76-100)           | -               | -                     |
|               |                        | Pakistan     | -                     | -                     | 73                  | 67 (9-99)             | -               | -                     |
|               |                        | South Africa | -                     | -                     | 84                  | 33 (4-78)             | -               | -                     |
|               |                        | Ukraine      | -                     | -                     | 369                 | 90 (80-96)            | -               | -                     |
|               |                        | Azerbaijan   | -                     | -                     | 141                 | 80 (65-91)            | -               | -                     |

\*adjusted with Wayne test results; CI - confidence interval

Supplement Table 4. Adjusted prevalence of resistance as measured using genetic sequencing and true prevalence of resistance determined using phenotypic testing.

| Drug         | Locus                  | Country      | adjusted prevalence of resistance |               |                     |               |           |               | true prevalence of resistance |               |                     |               |           |               |
|--------------|------------------------|--------------|-----------------------------------|---------------|---------------------|---------------|-----------|---------------|-------------------------------|---------------|---------------------|---------------|-----------|---------------|
|              |                        |              | RIF-susceptible cases             |               | RIF-resistant cases |               | All cases |               | RIF-susceptible cases         |               | RIF-resistant cases |               | All cases |               |
|              |                        |              | %                                 | (95%CI)       | %                   | (95%CI)       | %         | (95%CI)       | %                             | (95%CI)       | %                   | (95%CI)       | %         | (95%CI)       |
| rifampicin   | <i>rpoB</i>            | Azerbaijan   | -                                 | -             | -                   | -             | 20.4      | (17.3 - 23.7) | -                             | -             | -                   | -             | 19.3      | (16.6 - 22.4) |
|              |                        | Bangladesh   | -                                 | -             | -                   | -             | 7.3       | (5.6 - 9.1)   | -                             | -             | -                   | -             | 7.5       | (5.9 - 9.4)   |
|              |                        | Belarus      | -                                 | -             | -                   | -             | 53.8      | (45.8 - 61.9) | -                             | -             | -                   | -             | 52.4      | (45 - 59.6)   |
|              |                        | Pakistan     | -                                 | -             | -                   | -             | 6.5       | (5.2 - 7.9)   | -                             | -             | -                   | -             | 6.9       | (5.6 - 8.3)   |
|              |                        | Philippines  | -                                 | -             | -                   | -             | 8.3       | (6.6 - 10.3)  | -                             | -             | -                   | -             | 8.4       | (6.7 - 10.3)  |
|              |                        | South Africa | -                                 | -             | -                   | -             | 5.5       | (4.4 - 6.8)   | -                             | -             | -                   | -             | 5.7       | (4.6 - 6.9)   |
|              |                        | Ukraine      | -                                 | -             | -                   | -             | 34.0      | (30.8 - 37.3) | -                             | -             | -                   | -             | 32.6      | (29.9 - 35.4) |
| isoniazid    | <i>katG &amp; inhA</i> | Azerbaijan   | 17.8                              | (13.9 - 22.7) | 91.2                | (82.4 - 99)   | 32.1      | (27.3 - 38.2) | 17.5                          | (14.5 - 20.7) | 97.2                | (93 - 99.2)   | 32.9      | (29.5 - 36.4) |
|              |                        | Bangladesh   | 6.5                               | (4.6 - 8.8)   | 89.5                | (77.8 - 98.9) | 12.8      | (10.2 - 15.8) | 5.4                           | (4.0 - 7.1)   | 97.2                | (90.2 - 99.7) | 12.3      | (10.3 - 14.6) |
|              |                        | Belarus      | 26.4                              | (16.4 - 38.6) | 98.6                | (95.2 - 100)  | 70.2      | (59.8 - 83.6) | 22.6                          | (14.6 - 32.4) | 99.0                | (94.4 - 100)  | 61.8      | (54.5 - 68.7) |
|              |                        | Pakistan     | 7.6                               | (5.8 - 9.8)   | 74.9                | (63.4 - 87.1) | 12.1      | (10.0 - 14.7) | 9.3                           | (7.8 - 10.9)  | 90.1                | (82.5 - 95.1) | 14.9      | (13.1 - 16.8) |
|              |                        | Philippines  | 13.2                              | (10.3 - 16.8) | 83.8                | (71.7 - 95.8) | 18.4      | (15.3 - 22.3) | 13.0                          | (10.9 - 15.3) | 84.1                | (74.4 - 91.3) | 18.8      | (16.4 - 21.3) |
|              |                        | South Africa | 3.5                               | (2.5 - 4.9)   | 61.6                | (49.4 - 74.3) | 6.7       | (5.3 - 8.5)   | 5.8                           | (4.6 - 7.1)   | 65.5                | (54.6 - 75.4) | 9.2       | (7.8 - 10.7)  |
|              |                        | Ukraine      | 20.0                              | (16.1 - 25.1) | 98.6                | (95.8 - 100)  | 48.4      | (42.8 - 56.1) | 17.4                          | (14.7 - 20.2) | 97.3                | (95.1 - 98.7) | 43.4      | (40.5 - 46.3) |
| ofloxacin    | <i>gyrA &amp; gyrB</i> | Azerbaijan   | 0.7                               | (0.1 - 1.7)   | 23.1                | (16.2 - 31.1) | 5.1       | (3.5 - 7.0)   | 0.5                           | (0.1 - 1.5)   | 23.4                | (16.8 - 31.2) | 5.0       | (3.5 - 6.8)   |
|              |                        | Bangladesh   | 6.6                               | (4.3 - 10.1)  | 19.2                | (10.4 - 30.0) | 6.6       | (4.9 - 8.6)   | 4.9                           | (3.5 - 6.6)   | 15.9                | (8.2 - 26.7)  | 5.7       | (4.3 - 7.4)   |
|              |                        | Belarus      | 1.4                               | (0 - 5.3)     | 30.9                | (21.4 - 41.6) | 16.6      | (11.2 - 23.0) | 2.2                           | (0.3 - 7.6)   | 28.9                | (20.1 - 39)   | 15.8      | (10.9 - 21.8) |
|              |                        | Pakistan     | 24.8                              | (18.0 - 35.8) | 22.9                | (14.7 - 32.6) | 21.5      | (17.7 - 25.8) | 24.3                          | (20.6 - 28.3) | 22.7                | (14.8 - 32.3) | 24.1      | (20.7 - 27.7) |
|              |                        | South Africa | 0.3                               | (0 - 1.0)     | 13.9                | (7.2 - 22.6)  | 0.9       | (0.5 - 1.5)   | 0.2                           | (0 - 0.9)     | 13.6                | (7.2 - 22.6)  | 0.9       | (0.5 - 1.6)   |
|              |                        | Ukraine      | 1.1                               | (0.4 - 2.2)   | 18.6                | (14.4 - 23.2) | 6.8       | (5.3 - 8.6)   | 0.8                           | (0.3 - 1.7)   | 18.1                | (14.3 - 22.4) | 6.4       | (5.1 - 8.0)   |
| moxifloxacin | <i>gyrA &amp; gyrB</i> | Azerbaijan   | 0.6                               | (0.1 - 1.6)   | 22.5                | (15.7 - 30.2) | 4.9       | (3.4 - 6.7)   | 0.3                           | (0 - 1.2)     | 22.8                | (16.2 - 30.5) | 4.7       | (3.3 - 6.5)   |
|              |                        | Bangladesh   | 6.1                               | (4.0 - 9.5)   | 18.7                | (10.1 - 29.2) | 6.4       | (4.8 - 8.2)   | 4.8                           | (3.4 - 6.4)   | 15.9                | (8.2 - 26.7)  | 5.6       | (4.2 - 7.3)   |
|              |                        | Belarus      | 1.4                               | (0 - 5.1)     | 27.8                | (19.0 - 37.7) | 14.9      | (9.8 - 20.9)  | 2.2                           | (0.3 - 7.6)   | 27.8                | (19.2 - 37.9) | 15.3      | (10.5 - 21.2) |
|              |                        | Pakistan     | 22.7                              | (16.6 - 33.4) | 22.3                | (14.3 - 31.7) | 20.5      | (16.9 - 24.4) | 21.8                          | (18.3 - 25.6) | 20.6                | (13.1 - 30.0) | 21.6      | (18.4 - 25.1) |
|              |                        | South Africa | 0.3                               | (0 - 0.9)     | 13.6                | (7.1 - 21.9)  | 0.9       | (0.5 - 1.5)   | 0.3                           | (0 - 0.9)     | 12.6                | (6.5 - 21.5)  | 0.9       | (0.5 - 1.5)   |
|              |                        | Ukraine      | 1.4                               | (0.5 - 3.0)   | 19.0                | (14.4 - 24.1) | 7.6       | (5.7 - 9.7)   | 0.9                           | (0.3 - 2.1)   | 18.4                | (14.1 - 23.4) | 7.0       | (5.3 - 8.9)   |
| pyrazinamide | <i>pncA</i>            | Azerbaijan   | 2.8                               | (1.1 - 5.5)   | 59.9                | (41.4 - 84.6) | 13.7      | (8.9 - 21.2)  | 1.7                           | (0.8 - 3.0)   | 57.6                | (49.1 - 65.8) | 12.5      | (10.2 - 15.1) |
|              |                        | Bangladesh   | 24.8                              | (8.8 - 50.5)  | 63.3                | (31.8 - 95.4) | 36.1      | (18.9 - 61.9) | 30.6                          | (18.3 - 45.4) | 87.5                | (67.6 - 97.3) | 49.3      | (37.4 - 61.3) |
|              |                        | Belarus      | 8.7                               | (2.2 - 19.9)  | 93.8                | (81.4 - 99.8) | 66.8      | (46.5 - 93.3) | 4.2                           | (1.2 - 10.4)  | 79.4                | (70.3 - 86.8) | 43.1      | (36.1 - 50.4) |
|              |                        | Pakistan     | 6.3                               | (1.3 - 15.9)  | 51.5                | (27.9 - 83.0) | 19.9      | (10.3 - 34.1) | 7.1                           | (2.9 - 14.2)  | 71.7                | (56.5 - 84.0) | 27.8      | (20.6 - 35.9) |
|              |                        | South Africa | 1.3                               | (0.5 - 2.5)   | 47.7                | (29.3 - 72.4) | 3.7       | (2.2 - 6.1)   | 1.0                           | (0.5 - 1.6)   | 40.7                | (30.2 - 51.8) | 3.2       | (2.3 - 4.2)   |
|              |                        | Ukraine      | -                                 | -             | 57.2                | (41.6 - 79.1) | -         | -             | -                             | -             | 62.6                | (56.7 - 68.3) | -         | -             |
| kanamycin    | <i>rrs &amp; eis</i>   | Belarus      | -                                 | -             | 42.1                | (28.7 - 60.6) | -         | -             | -                             | -             | 36.1                | (26.6 - 46.5) | -         | -             |
|              |                        | Pakistan     | -                                 | -             | 5.2                 | (1.1 - 12.5)  | -         | -             | -                             | -             | 2.7                 | (0.3 - 9.4)   | -         | -             |
|              |                        | South Africa | -                                 | -             | 9.6                 | (2.0 - 22.8)  | -         | -             | -                             | -             | 5.1                 | (0.6 - 17.3)  | -         | -             |
|              |                        | Ukraine      | -                                 | -             | 29.5                | (22.3 - 40.1) | -         | -             | -                             | -             | 33.6                | (28.8 - 38.7) | -         | -             |
| amikacin     | <i>rrs</i>             | Azerbaijan   | -                                 | -             | 25.9                | (18.5 - 34.4) | -         | -             | -                             | -             | 26.4                | (19.3 - 34.5) | -         | -             |
|              |                        | Belarus      | -                                 | -             | 27.0                | (18.1 - 37)   | -         | -             | -                             | -             | 25.8                | (17.4 - 35.7) | -         | -             |
|              |                        | South Africa | -                                 | -             | 3.9                 | (0.8 - 9.2)   | -         | -             | -                             | -             | 3.6                 | (0.7 - 10.1)  | -         | -             |
|              |                        | Ukraine      | -                                 | -             | 17.1                | (13.1 - 21.6) | -         | -             | -                             | -             | 16.0                | (12.4 - 20.1) | -         | -             |
| capreomycin  | <i>rrs</i>             | Azerbaijan   | -                                 | -             | 30.5                | (20.4 - 45.2) | -         | -             | -                             | -             | 29.1                | (21.7 - 37.3) | -         | -             |
|              |                        | Belarus      | -                                 | -             | 31.0                | (19.5 - 47)   | -         | -             | -                             | -             | 24.7                | (16.5 - 34.5) | -         | -             |
|              |                        | Pakistan     | -                                 | -             | 5.1                 | (1.0 - 12.4)  | -         | -             | -                             | -             | 4.1                 | (0.9 - 11.5)  | -         | -             |
|              |                        | South Africa | -                                 | -             | 4.5                 | (0.9 - 10.9)  | -         | -             | -                             | -             | 7.1                 | (2.7 - 14.9)  | -         | -             |
|              |                        | Ukraine      | -                                 | -             | 19.7                | (14 - 28.6)   | -         | -             | -                             | -             | 16.8                | (13.1 - 21)   | -         | -             |

CI - confidence interval

Supplement Table 5. Mutations in *rpoB* gene associated with phenotypic resistance to rifampicin.

| <i>rpoB</i> mutation (codon position) | No. of isolates with adjusted resistant phenotype | No. of isolates with adjusted susceptible phenotype | No. of isolates with resistant phenotype | No. of isolates with susceptible phenotype | Medium used in discordant cases | Grading system | % on total RIF-R (total=958) |
|---------------------------------------|---------------------------------------------------|-----------------------------------------------------|------------------------------------------|--------------------------------------------|---------------------------------|----------------|------------------------------|
| Val170Phe*                            | 5                                                 | 0                                                   | 5                                        | 0                                          |                                 | Indeterminate  | 0.5                          |
| Glu423Ala + Ser450Trp                 | 1                                                 | 0                                                   | 1                                        | 0                                          |                                 | High           | 0.1                          |
| Del 425                               | 0                                                 | 1                                                   | 0                                        | 1                                          | 1 LJ                            | Indeterminate  | 0.0                          |
| Leu430Pro                             | 30                                                | 0                                                   | 10                                       | 20                                         | 8 LJ, 12 MGIT                   | Minimal        | 3.1                          |
| Leu430Pro + Asp435Gly                 | 1                                                 | 0                                                   | 1                                        | 0                                          |                                 | High           | 0.1                          |
| Leu430Pro + Asp435Tyr                 | 1                                                 | 0                                                   | 1                                        | 0                                          |                                 | Moderate       | 0.1                          |
| Leu430Pro + His445Asn                 | 1                                                 | 0                                                   | 1                                        | 0                                          |                                 | High           | 0.1                          |
| Leu430Pro + His445Gln                 | 3                                                 | 0                                                   | 3                                        | 0                                          |                                 | Minimal        | 0.3                          |
| Leu430Pro + Met434Ile                 | 1                                                 | 0                                                   | 1                                        | 0                                          |                                 | Minimal        | 0.1                          |
| Leu430Pro + Met434Val                 | 1                                                 | 0                                                   | 1                                        | 0                                          |                                 | Minimal        | 0.1                          |
| Ins 430                               | 1                                                 | 0                                                   | 1                                        | 0                                          |                                 | Indeterminate  | 0.1                          |
| Ins 430 + Asp435Gly                   | 1                                                 | 0                                                   | 1                                        | 0                                          |                                 | High           | 0.1                          |
| Ins 431                               | 1                                                 | 1                                                   | 1                                        | 1                                          | 1 LJ                            | Indeterminate  | 0.1                          |
| Gln432Glu + Glu481Ala                 | 1                                                 | 0                                                   | 1                                        | 0                                          |                                 | Indeterminate  | 0.1                          |
| Gln432Leu                             | 1                                                 | 0                                                   | 1                                        | 0                                          |                                 | High           | 0.1                          |
| Gln432Lys                             | 3                                                 | 0                                                   | 2                                        | 1                                          | 1 MGIT                          | High           | 0.3                          |
| Gln432Pro                             | 2                                                 | 0                                                   | 2                                        | 0                                          |                                 | High           | 0.2                          |
| Del 432                               | 2                                                 | 0                                                   | 2                                        | 0                                          |                                 | Indeterminate  | 0.2                          |
| Ins 432                               | 2                                                 | 0                                                   | 2                                        | 0                                          |                                 | Indeterminate  | 0.2                          |
| Ins 433                               | 2                                                 | 0                                                   | 2                                        | 0                                          |                                 | Indeterminate  | 0.2                          |
| Met434Leu + His445Asn                 | 1                                                 | 0                                                   | 0                                        | 1                                          | 1 LJ                            | Minimal        | 0.1                          |
| Met434Val + Asp435Gly                 | 1                                                 | 0                                                   | 0                                        | 1                                          | 1 LJ                            | High           | 0.1                          |
| Asp435Ala + Leu452Pro                 | 1                                                 | 0                                                   | 1                                        | 0                                          |                                 | High           | 0.1                          |
| Asp435Glu + Ser441Leu                 | 1                                                 | 0                                                   | 1                                        | 0                                          |                                 | Moderate       | 0.1                          |
| Asp435Glu + His445Asn                 | 1                                                 | 0                                                   | 1                                        | 0                                          |                                 | Minimal        | 0.1                          |
| Asp435Gly                             | 2                                                 | 0                                                   | 2                                        | 0                                          |                                 | High           | 0.2                          |
| Asp435Gly + His445Asn                 | 1                                                 | 0                                                   | 1                                        | 0                                          |                                 | High           | 0.1                          |
| Asp435Gly + Leu452Pro                 | 1                                                 | 0                                                   | 1                                        | 0                                          |                                 | High           | 0.1                          |
| Asp435Phe                             | 4                                                 | 0                                                   | 4                                        | 0                                          |                                 | High           | 0.4                          |
| Asp435Tyr                             | 24                                                | 0                                                   | 12                                       | 12                                         | 4 LJ, 8 MGIT                    | Moderate       | 2.5                          |
| Asp435Val                             | 35                                                | 0                                                   | 30                                       | 5                                          | 5 LJ                            | High           | 3.7                          |
| Ser441Gln                             | 1                                                 | 0                                                   | 1                                        | 0                                          |                                 | High           | 0.1                          |
| Ser441Leu                             | 2                                                 | 0                                                   | 1                                        | 1                                          | 1 LJ                            | Moderate       | 0.2                          |
| His445Arg                             | 15                                                | 0                                                   | 14                                       | 1                                          | 1 LJ                            | High           | 1.6                          |
| His445Asn                             | 10                                                | 0                                                   | 4                                        | 6                                          | 5 LJ, 1 MGIT                    | Minimal        | 1.0                          |
| His445Asn + Ile491Met                 | 1                                                 | 0                                                   | 1                                        | 0                                          |                                 | Minimal        | 0.1                          |
| His445Asp                             | 50                                                | 0                                                   | 46                                       | 4                                          | 2 LJ, 2 MGIT                    | High           | 5.2                          |
| His445Cys                             | 1                                                 | 0                                                   | 1                                        | 0                                          |                                 | High           | 0.1                          |
| His445Leu                             | 22                                                | 0                                                   | 18                                       | 4                                          | 3 LJ, 1 MGIT                    | High           | 2.3                          |
| His445Phe                             | 1                                                 | 0                                                   | 1                                        | 0                                          |                                 | Indeterminate  | 0.1                          |
| His445Ser                             | 0                                                 | 2                                                   | 0                                        | 2                                          | 2 LJ                            | Indeterminate  | 0.0                          |
| His445Ser + Lys446Gln                 | 1                                                 | 0                                                   | 1                                        | 0                                          |                                 | Indeterminate  | 0.1                          |
| His445Thr                             | 1                                                 | 0                                                   | 1                                        | 0                                          |                                 | Indeterminate  | 0.1                          |
| His445Tyr                             | 34                                                | 0                                                   | 31                                       | 3                                          | 3 LJ                            | High           | 3.5                          |
| Arg448Lys                             | 1                                                 | 0                                                   | 1                                        | 0                                          |                                 | Indeterminate  | 0.1                          |
| Del 449                               | 1                                                 | 0                                                   | 1                                        | 0                                          |                                 | Indeterminate  | 0.1                          |
| Ser450Cys                             | 1                                                 | 1                                                   | 1                                        | 1                                          | 1 MGIT                          | Indeterminate  | 0.1                          |
| Ser450Leu                             | 541                                               | 0                                                   | 530                                      | 11                                         | 7 LJ, 4 MGIT                    | High           | 56.5                         |
| Ser450Leu + Ile491Val                 | 3                                                 | 0                                                   | 3                                        | 0                                          |                                 | High           | 0.3                          |
| Ser450Leu + Leu452Pro                 | 1                                                 | 0                                                   | 1                                        | 0                                          |                                 | High           | 0.1                          |
| Ser450Phe                             | 38                                                | 0                                                   | 38                                       | 0                                          |                                 | High           | 4.0                          |
| Ser450Trp                             | 9                                                 | 0                                                   | 9                                        | 0                                          |                                 | High           | 0.9                          |
| Leu452Pro                             | 27                                                | 0                                                   | 12                                       | 15                                         | 8 LJ, 7 MGIT                    | Moderate       | 2.8                          |
| Ile491Phe*                            | 5                                                 | 0                                                   | 3                                        | 2                                          | 2 MGIT                          | Minimal        | 0.5                          |
| Ins 849*                              | 0                                                 | 1                                                   | 0                                        | 1                                          | 1 LJ                            | Indeterminate  | 0.0                          |
| WT**                                  | 60                                                | 6046                                                |                                          |                                            |                                 | -              | 6.3                          |
| <b>TOTAL</b>                          | <b>958</b>                                        | <b>6052</b>                                         |                                          |                                            |                                 |                | <b>100.0</b>                 |

\* mutations outside Rifampicin Resistance-Determining Region (RRDR); Ins: insertion; Del: deletion

\*\*WT: includes wild-type, silent mutations and phylogenetically informative variants

Supplement Table 6. Mutations in *katG* and *inhA* genes and *fabG* promoter associated with phenotypic resistance to isoniazid.

| <i>katG</i> mutation (codon position) | <i>inhA</i> mutation (codon position) | No. of isolates with adjusted resistant phenotype | No. of isolates with adjusted susceptible phenotype | No. of isolates with resistant phenotype | No. of isolates with susceptible phenotype | Medium used in discordant cases | Grading system | % on total INH-R (total=1519) |
|---------------------------------------|---------------------------------------|---------------------------------------------------|-----------------------------------------------------|------------------------------------------|--------------------------------------------|---------------------------------|----------------|-------------------------------|
| Ins 6 + Del 10                        | wt                                    | 1                                                 | 0                                                   | 1                                        | 0                                          |                                 | Indeterminate  | 0.1                           |
| Ins 41                                | wt                                    | 1                                                 | 0                                                   | 1                                        | 0                                          |                                 | Indeterminate  | 0.1                           |
| Ins 92                                | wt                                    | 1                                                 | 0                                                   | 1                                        | 0                                          |                                 | Indeterminate  | 0.1                           |
| Asp94Ala                              | wt                                    | 1                                                 | 0                                                   | 1                                        | 0                                          |                                 | Indeterminate  | 0.1                           |
| Asp94Tyr + Ala621Asp                  | wt                                    | 1                                                 | 0                                                   | 1                                        | 0                                          |                                 | Indeterminate  | 0.1                           |
| His108Arg                             | wt                                    | 1                                                 | 0                                                   | 1                                        | 0                                          |                                 | Indeterminate  | 0.1                           |
| Ala109Val                             | wt                                    | 2                                                 | 0                                                   | 2                                        | 0                                          |                                 | Indeterminate  | 0.1                           |
| Gly125Asp                             | wt                                    | 1                                                 | 0                                                   | 1                                        | 0                                          |                                 | Indeterminate  | 0.1                           |
| Met126Ile + Trp191Gly                 | wt                                    | 1                                                 | 0                                                   | 1                                        | 0                                          |                                 | Indeterminate  | 0.1                           |
| Del 131                               | wt                                    | 1                                                 | 0                                                   | 1                                        | 0                                          |                                 | Indeterminate  | 0.1                           |
| Asn138Asp                             | wt                                    | 1                                                 | 0                                                   | 1                                        | 0                                          |                                 | Indeterminate  | 0.1                           |
| Ser140Asn + Asp142Gly                 | wt                                    | 1                                                 | 0                                                   | 1                                        | 0                                          |                                 | Indeterminate  | 0.1                           |
| Leu141Phe                             | wt                                    | 2                                                 | 0                                                   | 2                                        | 0                                          |                                 | Indeterminate  | 0.1                           |
| Asp142Gly                             | wt                                    | 1                                                 | 1                                                   | 1                                        | 1                                          | 1 MGIT                          | Indeterminate  | 0.1                           |
| Trp149Arg                             | wt                                    | 1                                                 | 0                                                   | 1                                        | 0                                          |                                 | Indeterminate  | 0.1                           |
| Ins 153 + Ser315Arg                   | wt                                    | 1                                                 | 0                                                   | 1                                        | 0                                          |                                 | Indeterminate  | 0.1                           |
| Asp163Asn                             | wt                                    | 1                                                 | 0                                                   | 1                                        | 0                                          |                                 | Indeterminate  | 0.1                           |
| Gly169Val                             | wt                                    | 1                                                 | 0                                                   | 1                                        | 0                                          |                                 | Indeterminate  | 0.1                           |
| Met176Ile                             | wt                                    | 1                                                 | 0                                                   | 1                                        | 0                                          |                                 | Indeterminate  | 0.1                           |
| Val196Ala + Leu514Pro                 | wt                                    | 1                                                 | 0                                                   | 1                                        | 0                                          |                                 | Indeterminate  | 0.1                           |
| Trp198Stop                            | wt                                    | 1                                                 | 0                                                   | 1                                        | 0                                          |                                 | Indeterminate  | 0.1                           |
| Del 199                               | wt                                    | 1                                                 | 0                                                   | 1                                        | 0                                          |                                 | Indeterminate  | 0.1                           |
| Thr251Pro                             | wt                                    | 1                                                 | 0                                                   | 1                                        | 0                                          |                                 | Indeterminate  | 0.1                           |
| Thr275Pro                             | wt                                    | 1                                                 | 0                                                   | 1                                        | 0                                          |                                 | Indeterminate  | 0.1                           |
| Gly279Asp                             | wt                                    | 2                                                 | 0                                                   | 2                                        | 0                                          |                                 | Indeterminate  | 0.1                           |
| Pro280Ser                             | wt                                    | 0                                                 | 8                                                   | 0                                        | 8                                          |                                 | Indeterminate  | 0.0                           |
| Leu298Ser                             | wt                                    | 1                                                 | 0                                                   | 1                                        | 0                                          |                                 | Indeterminate  | 0.1                           |
| Gly299Ser                             | wt                                    | 2                                                 | 0                                                   | 2                                        | 0                                          |                                 | Indeterminate  | 0.1                           |
| Trp300Gly                             | wt                                    | 1                                                 | 0                                                   | 1                                        | 0                                          |                                 | Indeterminate  | 0.1                           |
| Ser315Arg                             | wt                                    | 2                                                 | 0                                                   | 2                                        | 0                                          |                                 | Indeterminate  | 0.1                           |
| Ser315Asn                             | wt                                    | 7                                                 | 0                                                   | 7                                        | 0                                          |                                 | High           | 0.5                           |
| Ser315Asp                             | wt                                    | 2                                                 | 0                                                   | 2                                        | 0                                          |                                 | Indeterminate  | 0.1                           |
| Ser315Gly                             | wt                                    | 1                                                 | 1                                                   | 1                                        | 1                                          | 1 LJ                            | Indeterminate  | 0.1                           |
| Ser315Ile                             | wt                                    | 1                                                 | 0                                                   | 1                                        | 0                                          |                                 | Indeterminate  | 0.1                           |
| Ser315Thr                             | wt                                    | 885                                               | 0                                                   | 855                                      | 30                                         | 28 LJ, 2 MGIT                   | High           | 58.3                          |
| Glu318Ala                             | wt                                    | 1                                                 | 0                                                   | 1                                        | 0                                          |                                 | Indeterminate  | 0.1                           |
| Trp321Stop                            | wt                                    | 1                                                 | 0                                                   | 1                                        | 0                                          |                                 | Indeterminate  | 0.1                           |
| Thr324Pro                             | wt                                    | 1                                                 | 0                                                   | 1                                        | 0                                          |                                 | Indeterminate  | 0.1                           |
| Ins 335                               | wt                                    | 1                                                 | 0                                                   | 1                                        | 0                                          |                                 | Indeterminate  | 0.1                           |
| Thr344Pro                             | wt                                    | 1                                                 | 0                                                   | 1                                        | 0                                          |                                 | Indeterminate  | 0.1                           |
| Thr376Gln + Met377Val                 | wt                                    | 1                                                 | 0                                                   | 1                                        | 0                                          |                                 | Indeterminate  | 0.1                           |
| Thr380Ile                             | wt                                    | 1                                                 | 0                                                   | 1                                        | 0                                          |                                 | Indeterminate  | 0.1                           |
| Ins380                                | wt                                    | 1                                                 | 0                                                   | 1                                        | 0                                          |                                 | Indeterminate  | 0.1                           |
| Arg418Stop                            | wt                                    | 2                                                 | 0                                                   | 2                                        | 0                                          |                                 | Indeterminate  | 0.1                           |
| Asp419Tyr                             | wt                                    | 1                                                 | 0                                                   | 1                                        | 0                                          |                                 | Indeterminate  | 0.1                           |
| Del 428                               | wt                                    | 1                                                 | 0                                                   | 1                                        | 0                                          |                                 | Indeterminate  | 0.1                           |
| Del 458                               | wt                                    | 1                                                 | 0                                                   | 1                                        | 0                                          |                                 | Indeterminate  | 0.1                           |
| Gln461Pro                             | wt                                    | 1                                                 | 0                                                   | 1                                        | 0                                          |                                 | Indeterminate  | 0.1                           |
| Del 480                               | wt                                    | 1                                                 | 0                                                   | 1                                        | 0                                          |                                 | Indeterminate  | 0.1                           |
| Gly494Ala                             | wt                                    | 1                                                 | 0                                                   | 1                                        | 0                                          |                                 | Indeterminate  | 0.1                           |
| Arg496Cys + Asn508Asp                 | wt                                    | 1                                                 | 0                                                   | 1                                        | 0                                          |                                 | Indeterminate  | 0.1                           |
| Ins 669                               | wt                                    | 1                                                 | 0                                                   | 1                                        | 0                                          |                                 | Indeterminate  | 0.1                           |
| Ser671Stop                            | wt                                    | 1                                                 | 0                                                   | 1                                        | 0                                          |                                 | Indeterminate  | 0.1                           |
| Leu704Ser                             | wt                                    | 1                                                 | 0                                                   | 1                                        | 0                                          |                                 | Indeterminate  | 0.1                           |
| wt                                    | Del -34                               | 1                                                 | 0                                                   | 1                                        | 0                                          |                                 | Indeterminate  | 0.1                           |
| wt                                    | g-17t                                 | 2                                                 | 3                                                   | 2                                        | 3                                          | 3 LJ                            | Indeterminate  | 0.1                           |
| wt                                    | c-15t                                 | 171                                               | 0                                                   | 148                                      | 23                                         | 19 LJ, 4 MGIT                   | Moderate       | 11.3                          |
| wt                                    | c-15t + g-17t                         | 1                                                 | 0                                                   | 1                                        | 0                                          |                                 | Moderate       | 0.1                           |
| wt                                    | c-15t + Ile21Val                      | 1                                                 | 0                                                   | 1                                        | 0                                          |                                 | Moderate       | 0.1                           |
| wt                                    | c-15t + Ser94Ala                      | 2                                                 | 0                                                   | 2                                        | 0                                          |                                 | Moderate       | 0.1                           |
| wt                                    | c-15t + Ile194Thr                     | 1                                                 | 0                                                   | 1                                        | 0                                          |                                 | Moderate       | 0.1                           |
| wt                                    | t-8a                                  | 3                                                 | 6                                                   | 3                                        | 6                                          | 5 LJ, 1 MGIT                    | Indeterminate  | 0.2                           |
| wt                                    | t-8a + Ile194Thr                      | 1                                                 | 0                                                   | 1                                        | 0                                          |                                 | Indeterminate  | 0.1                           |
| wt                                    | t-8c                                  | 4                                                 | 9                                                   | 4                                        | 9                                          | 6 LJ, 3 MGIT                    | Indeterminate  | 0.3                           |
| wt                                    | t-8g                                  | 1                                                 | 0                                                   | 1                                        | 0                                          |                                 | Indeterminate  | 0.1                           |
| wt                                    | Ile21Thr                              | 2                                                 | 0                                                   | 2                                        | 0                                          |                                 | Indeterminate  | 0.1                           |
| wt                                    | Ile21Val                              | 1                                                 | 2                                                   | 1                                        | 2                                          | 2 LJ                            | Indeterminate  | 0.1                           |
| wt                                    | Ser94Ala                              | 2                                                 | 1                                                   | 2                                        | 1                                          | 1 LJ                            | Indeterminate  | 0.1                           |
| wt                                    | Ile194Thr                             | 1                                                 | 0                                                   | 1                                        | 0                                          |                                 | Indeterminate  | 0.1                           |
| Pro280Ser                             | c-15t                                 | 1                                                 | 0                                                   | 1                                        | 0                                          |                                 | Moderate       | 0.1                           |
| Ser315Gly                             | c-15t                                 | 1                                                 | 0                                                   | 1                                        | 0                                          |                                 | Moderate       | 0.1                           |
| Ser315Thr                             | g-17t                                 | 1                                                 | 0                                                   | 1                                        | 0                                          |                                 | High           | 0.1                           |
| Ser315Thr                             | c-15t                                 | 182                                               | 0                                                   | 179                                      | 3                                          | 3 LJ                            | High           | 12.0                          |
| Ser315Thr                             | t-8a                                  | 9                                                 | 0                                                   | 8                                        | 1                                          | 1 MGIT                          | High           | 0.6                           |
| Ser315Thr                             | t-8c                                  | 23                                                | 0                                                   | 23                                       | 0                                          |                                 | High           | 1.5                           |
| Ser315Thr                             | t-8c + c-15t                          | 1                                                 | 0                                                   | 1                                        | 0                                          |                                 | High           | 0.1                           |
| Ser315Thr                             | Ser94Ala                              | 1                                                 | 0                                                   | 1                                        | 0                                          |                                 | High           | 0.1                           |
| Tyr413Cys                             | c-15t                                 | 1                                                 | 0                                                   | 1                                        | 0                                          |                                 | Moderate       | 0.1                           |
| WT**                                  |                                       | 155                                               | 5468                                                |                                          |                                            |                                 | -              | 10.2                          |
| <b>TOTAL</b>                          |                                       | <b>1519</b>                                       | <b>5499</b>                                         |                                          |                                            |                                 |                | <b>100.0</b>                  |

Ins: insertion; Del: deletion

\*\*WT: includes wild-type, silent mutations and phylogenetically informative variants

Supplement Table 7. Mutations in *pncA* gene associated with phenotypic resistance to pyrazinamide.

| <i>pncA</i> mutation (codon position) | No. of isolates with adjusted resistant phenotype | No. of isolates with adjusted susceptible phenotype | No. of isolates with resistant phenotype | No. of isolates with susceptible phenotype | No. of isolates with Pzase negative | No. of isolates with Pzase positive | Grading system | % on total PZA-R (total=500) | Indetermined mutations- role according to literature |
|---------------------------------------|---------------------------------------------------|-----------------------------------------------------|------------------------------------------|--------------------------------------------|-------------------------------------|-------------------------------------|----------------|------------------------------|------------------------------------------------------|
| a-15c                                 | 0                                                 | 1                                                   | 0                                        | 1                                          | 1                                   | 0                                   | Indeterminate  | 0.0                          | unknown (unclear role)                               |
| a-15c + Leu4Ser                       | 2                                                 | 0                                                   | 2                                        | 0                                          | 0                                   | 0                                   | Indeterminate  | 0.4                          | resistant                                            |
| a-15c + Ser67Pro                      | 1                                                 | 0                                                   | 1                                        | 0                                          | 0                                   | 0                                   | High           | 0.2                          |                                                      |
| t-12g                                 | 1                                                 | 0                                                   | 1                                        | 0                                          | 0                                   | 0                                   | Indeterminate  | 0.2                          | likely resistant                                     |
| a-11c                                 | 3                                                 | 0                                                   | 3                                        | 0                                          | 0                                   | 0                                   | Indeterminate  | 0.6                          | likely resistant                                     |
| a-11g                                 | 29                                                | 0                                                   | 29                                       | 0                                          | 0                                   | 0                                   | High           | 5.8                          |                                                      |
| a-11g + Ile6Leu                       | 1                                                 | 0                                                   | 1                                        | 0                                          | 0                                   | 0                                   | High           | 0.2                          |                                                      |
| Del -7*                               | 1                                                 | 0                                                   | 1                                        | 0                                          | 1                                   | 0                                   | Indeterminate  | 0.2                          | likely resistant                                     |
| Del -5                                | 1                                                 | 0                                                   | 1                                        | 0                                          | 0                                   | 0                                   | High           | 0.2                          |                                                      |
| Met1Thr                               | 3                                                 | 0                                                   | 3                                        | 0                                          | 0                                   | 0                                   | Indeterminate  | 0.6                          | resistant                                            |
| Ala3Pro + Leu182Ser                   | 1                                                 | 0                                                   | 1                                        | 0                                          | 0                                   | 0                                   | Indeterminate  | 0.2                          | resistant                                            |
| Del 3                                 | 1                                                 | 0                                                   | 1                                        | 0                                          | 0                                   | 0                                   | High           | 0.2                          |                                                      |
| Leu4Ser                               | 2                                                 | 0                                                   | 2                                        | 0                                          | 0                                   | 0                                   | Indeterminate  | 0.4                          | resistant                                            |
| Leu4Stop                              | 1                                                 | 0                                                   | 1                                        | 0                                          | 0                                   | 0                                   | High           | 0.2                          |                                                      |
| Leu4Trp                               | 2                                                 | 0                                                   | 2                                        | 0                                          | 0                                   | 0                                   | Indeterminate  | 0.4                          | resistant                                            |
| Ile5Thr                               | 1                                                 | 0                                                   | 1                                        | 0                                          | 0                                   | 0                                   | Indeterminate  | 0.2                          | resistant                                            |
| Val7Ala                               | 2                                                 | 0                                                   | 2                                        | 0                                          | 0                                   | 0                                   | Indeterminate  | 0.4                          | likely resistant                                     |
| Val7Gly                               | 9                                                 | 0                                                   | 9                                        | 0                                          | 0                                   | 0                                   | High           | 1.8                          |                                                      |
| Del 7                                 | 1                                                 | 0                                                   | 1                                        | 0                                          | 0                                   | 0                                   | High           | 0.2                          |                                                      |
| Asp8Ala                               | 1                                                 | 0                                                   | 1                                        | 0                                          | 0                                   | 0                                   | Indeterminate  | 0.2                          | resistant                                            |
| Val9Gly                               | 2                                                 | 0                                                   | 2                                        | 0                                          | 2                                   | 0                                   | Indeterminate  | 0.4                          | resistant                                            |
| Gln10Arg                              | 3                                                 | 0                                                   | 3                                        | 0                                          | 0                                   | 0                                   | Indeterminate  | 0.6                          | resistant                                            |
| Gln10His                              | 1                                                 | 0                                                   | 1                                        | 0                                          | 0                                   | 0                                   | Indeterminate  | 0.2                          | likely resistant                                     |
| Gln10His + Asn11His                   | 1                                                 | 0                                                   | 1                                        | 0                                          | 0                                   | 0                                   | Indeterminate  | 0.2                          | likely resistant                                     |
| Gln10Pro                              | 3                                                 | 0                                                   | 3                                        | 0                                          | 0                                   | 0                                   | High           | 0.6                          |                                                      |
| Gln10Stop                             | 2                                                 | 0                                                   | 1                                        | 1                                          | 0                                   | 0                                   | High           | 0.4                          |                                                      |
| Asp12Ala                              | 3                                                 | 0                                                   | 2                                        | 1                                          | 0                                   | 1                                   | High           | 0.6                          |                                                      |
| Asp12Asn                              | 1                                                 | 0                                                   | 1                                        | 0                                          | 0                                   | 0                                   | High           | 0.2                          |                                                      |
| Phe13Leu                              | 1                                                 | 0                                                   | 1                                        | 0                                          | 0                                   | 0                                   | Indeterminate  | 0.2                          | resistant                                            |
| Cys14Arg                              | 6                                                 | 0                                                   | 6                                        | 0                                          | 6                                   | 0                                   | High           | 1.2                          |                                                      |
| Cys14Gly                              | 0                                                 | 1                                                   | 0                                        | 1                                          | 0                                   | 0                                   | Indeterminate  | 0.0                          | likely susceptible                                   |
| Del 16                                | 2                                                 | 0                                                   | 2                                        | 0                                          | 0                                   | 0                                   | High           | 0.4                          |                                                      |
| Ins 16                                | 1                                                 | 0                                                   | 1                                        | 0                                          | 0                                   | 0                                   | High           | 0.2                          |                                                      |
| Gly17Val                              | 1                                                 | 0                                                   | 1                                        | 0                                          | 0                                   | 0                                   | Indeterminate  | 0.2                          | unknown (unclear role)                               |
| Ser18Stop                             | 4                                                 | 0                                                   | 4                                        | 0                                          | 0                                   | 0                                   | High           | 0.8                          |                                                      |
| Leu19Pro                              | 4                                                 | 0                                                   | 4                                        | 0                                          | 0                                   | 0                                   | Indeterminate  | 0.8                          | resistant                                            |
| Leu27Pro                              | 1                                                 | 0                                                   | 1                                        | 0                                          | 0                                   | 0                                   | Indeterminate  | 0.2                          | resistant                                            |
| Leu27Pro + Thr100Pro                  | 1                                                 | 0                                                   | 1                                        | 0                                          | 0                                   | 0                                   | Indeterminate  | 0.2                          | resistant                                            |
| Ile31Ser                              | 6                                                 | 0                                                   | 6                                        | 0                                          | 0                                   | 0                                   | Indeterminate  | 1.2                          | resistant                                            |
| Ins 31                                | 1                                                 | 0                                                   | 1                                        | 0                                          | 0                                   | 0                                   | High           | 0.2                          |                                                      |
| Tyr34Asp                              | 3                                                 | 0                                                   | 3                                        | 0                                          | 2                                   | 0                                   | High           | 0.6                          |                                                      |
| Tyr34Ser                              | 2                                                 | 0                                                   | 2                                        | 0                                          | 0                                   | 0                                   | Indeterminate  | 0.4                          | unknown (unclear role)                               |
| Glu37Stop                             | 1                                                 | 0                                                   | 1                                        | 0                                          | 0                                   | 0                                   | High           | 0.2                          |                                                      |
| Del 40                                | 1                                                 | 0                                                   | 1                                        | 0                                          | 1                                   | 0                                   | High           | 0.2                          |                                                      |
| Ins 39                                | 1                                                 | 0                                                   | 1                                        | 0                                          | 0                                   | 0                                   | High           | 0.2                          |                                                      |
| Del 40 + Thr119Stop                   | 1                                                 | 0                                                   | 1                                        | 0                                          | 0                                   | 0                                   | High           | 0.2                          |                                                      |
| Del 42                                | 2                                                 | 0                                                   | 2                                        | 0                                          | 0                                   | 0                                   | High           | 0.4                          |                                                      |
| Thr47Asn                              | 2                                                 | 0                                                   | 2                                        | 0                                          | 0                                   | 0                                   | Indeterminate  | 0.4                          | unknown (new mutation)                               |
| Thr47Pro                              | 1                                                 | 0                                                   | 1                                        | 0                                          | 0                                   | 0                                   | Indeterminate  | 0.2                          | resistant                                            |
| Lys48Glu                              | 2                                                 | 0                                                   | 2                                        | 0                                          | 0                                   | 0                                   | Indeterminate  | 0.4                          | resistant                                            |
| Lys48Glu + Asp136Gly                  | 1                                                 | 0                                                   | 1                                        | 0                                          | 0                                   | 0                                   | Indeterminate  | 0.2                          | resistant                                            |
| Asp49Asn                              | 1                                                 | 0                                                   | 1                                        | 0                                          | 0                                   | 0                                   | Indeterminate  | 0.2                          | resistant                                            |
| Asp49Glu                              | 1                                                 | 0                                                   | 1                                        | 0                                          | 1                                   | 0                                   | Indeterminate  | 0.2                          | resistant                                            |
| Asp49Gly                              | 28                                                | 0                                                   | 26                                       | 2                                          | 1                                   | 1                                   | High           | 5.6                          |                                                      |
| Del 50                                | 1                                                 | 0                                                   | 1                                        | 0                                          | 0                                   | 0                                   | High           | 0.2                          |                                                      |
| Ins 50                                | 1                                                 | 0                                                   | 1                                        | 0                                          | 0                                   | 0                                   | High           | 0.2                          |                                                      |
| His51Arg                              | 2                                                 | 0                                                   | 2                                        | 0                                          | 0                                   | 0                                   | Indeterminate  | 0.4                          | resistant                                            |
| His51Asp                              | 1                                                 | 0                                                   | 1                                        | 0                                          | 0                                   | 0                                   | Indeterminate  | 0.2                          | likely resistant                                     |
| His51Gln                              | 4                                                 | 0                                                   | 3                                        | 1                                          | 1                                   | 0                                   | High           | 0.8                          |                                                      |
| His51Pro                              | 1                                                 | 0                                                   | 1                                        | 0                                          | 0                                   | 0                                   | Indeterminate  | 0.2                          | resistant                                            |
| Del 54                                | 1                                                 | 0                                                   | 1                                        | 0                                          | 0                                   | 0                                   | High           | 0.2                          |                                                      |
| Pro54Leu                              | 2                                                 | 0                                                   | 2                                        | 0                                          | 0                                   | 0                                   | Moderate       | 0.4                          |                                                      |
| His57Arg                              | 1                                                 | 0                                                   | 0                                        | 1                                          | 0                                   | 0                                   | High           | 0.2                          |                                                      |
| His57Asp                              | 7                                                 | 0                                                   | 7                                        | 0                                          | 1                                   | 0                                   | High           | 1.4                          | resistant                                            |
| His57Pro                              | 1                                                 | 0                                                   | 1                                        | 0                                          | 0                                   | 0                                   | Indeterminate  | 0.2                          | resistant                                            |
| His57Tyr                              | 2                                                 | 0                                                   | 2                                        | 0                                          | 0                                   | 0                                   | High           | 0.4                          |                                                      |
| Phe58Cys + Val128Gly                  | 1                                                 | 0                                                   | 1                                        | 0                                          | 0                                   | 0                                   | High           | 0.2                          |                                                      |
| Phe58Ser                              | 1                                                 | 0                                                   | 1                                        | 0                                          | 1                                   | 0                                   | Indeterminate  | 0.2                          | likely resistant                                     |
| Ser59Pro                              | 1                                                 | 0                                                   | 1                                        | 0                                          | 1                                   | 0                                   | Indeterminate  | 0.2                          | resistant                                            |
| Ins 62                                | 1                                                 | 0                                                   | 0                                        | 1                                          | 1                                   | 0                                   | High           | 0.2                          |                                                      |
| Pro62Leu                              | 3                                                 | 0                                                   | 3                                        | 0                                          | 0                                   | 0                                   | Indeterminate  | 0.6                          | resistant                                            |
| Asp63Ala                              | 1                                                 | 0                                                   | 1                                        | 0                                          | 0                                   | 0                                   | Indeterminate  | 0.2                          | resistant                                            |
| Asp63Gly                              | 3                                                 | 0                                                   | 2                                        | 1                                          | 0                                   | 0                                   | High           | 0.6                          |                                                      |
| Tyr64Stop                             | 1                                                 | 0                                                   | 1                                        | 0                                          | 0                                   | 0                                   | High           | 0.2                          |                                                      |
| Ins 65*                               | 1                                                 | 0                                                   | 1                                        | 0                                          | 0                                   | 0                                   | Indeterminate  | 0.2                          | likely resistant                                     |
| Ser67Pro                              | 2                                                 | 0                                                   | 2                                        | 0                                          | 0                                   | 0                                   | High           | 0.4                          |                                                      |
| Trp68Arg                              | 2                                                 | 0                                                   | 2                                        | 0                                          | 0                                   | 0                                   | High           | 0.4                          |                                                      |
| Trp68Gly                              | 9                                                 | 0                                                   | 9                                        | 0                                          | 1                                   | 0                                   | Moderate       | 1.8                          |                                                      |
| Trp68Ser                              | 1                                                 | 0                                                   | 1                                        | 0                                          | 0                                   | 0                                   | Indeterminate  | 0.2                          | likely resistant                                     |
| Pro69Leu                              | 3                                                 | 0                                                   | 3                                        | 0                                          | 0                                   | 0                                   | Indeterminate  | 0.6                          | likely resistant                                     |
| His71Gln                              | 1                                                 | 0                                                   | 1                                        | 0                                          | 1                                   | 0                                   | Indeterminate  | 0.2                          | resistant                                            |
| His71Tyr                              | 9                                                 | 0                                                   | 8                                        | 1                                          | 5                                   | 0                                   | High           | 1.8                          |                                                      |
| Cys72Arg                              | 1                                                 | 0                                                   | 1                                        | 0                                          | 0                                   | 0                                   | High           | 0.2                          |                                                      |
| Ins 73                                | 1                                                 | 0                                                   | 1                                        | 0                                          | 0                                   | 0                                   | High           | 0.2                          |                                                      |
| Thr76Ile                              | 2                                                 | 0                                                   | 2                                        | 0                                          | 1                                   | 0                                   | Indeterminate  | 0.4                          | resistant                                            |
| Thr76Pro                              | 6                                                 | 0                                                   | 6                                        | 0                                          | 1                                   | 0                                   | High           | 1.2                          |                                                      |
| Del 77                                | 1                                                 | 0                                                   | 0                                        | 1                                          | 1                                   | 0                                   | High           | 0.2                          |                                                      |
| Gly78Cys                              | 1                                                 | 0                                                   | 1                                        | 0                                          | 0                                   | 0                                   | Indeterminate  | 0.2                          | unknown (unclear role)                               |
| Ala79Glu                              | 1                                                 | 0                                                   | 1                                        | 0                                          | 0                                   | 0                                   | Indeterminate  | 0.2                          | unknown (unclear role)                               |
| Phe81Val                              | 1                                                 | 0                                                   | 1                                        | 0                                          | 0                                   | 0                                   | Indeterminate  | 0.2                          | resistant                                            |
| Ins 81                                | 1                                                 | 0                                                   | 1                                        | 0                                          | 0                                   | 0                                   | High           | 0.2                          |                                                      |
| His82Arg                              | 5                                                 | 0                                                   | 5                                        | 0                                          | 0                                   | 0                                   | High           | 1.0                          |                                                      |
| Ins 82                                | 2                                                 | 0                                                   | 2                                        | 0                                          | 0                                   | 0                                   | High           | 0.4                          |                                                      |
| Leu85Arg                              | 1                                                 | 0                                                   | 1                                        | 0                                          | 0                                   | 0                                   | High           | 0.2                          |                                                      |
| Leu85Pro                              | 7                                                 | 0                                                   | 7                                        | 0                                          | 0                                   | 0                                   | High           | 1.4                          |                                                      |
| Ins 93*                               | 1                                                 | 0                                                   | 1                                        | 0                                          | 0                                   | 0                                   | Indeterminate  | 0.2                          | likely resistant                                     |
| Val93Ala                              | 1                                                 | 1                                                   | 1                                        | 1                                          | 0                                   | 0                                   | Indeterminate  | 0.2                          | unknown (unclear role)                               |
| Val93Gly                              | 1                                                 | 0                                                   | 1                                        | 0                                          | 0                                   | 0                                   | Indeterminate  | 0.2                          | unknown (new mutation)                               |

| pncA mutation (codon position) | No. of isolates with adjusted resistant phenotype | No. of isolates with adjusted susceptible phenotype | No. of isolates with resistant phenotype | No. of isolates with susceptible phenotype | No. of isolates with Pzase negative | No. of isolates with Pzase positive | Grading system | % on total PZA-R (total=500) | Indetermined mutations - role according to literature |
|--------------------------------|---------------------------------------------------|-----------------------------------------------------|------------------------------------------|--------------------------------------------|-------------------------------------|-------------------------------------|----------------|------------------------------|-------------------------------------------------------|
| Val93Met                       | 1                                                 | 0                                                   | 1                                        | 0                                          | 0                                   | 0                                   | Indeterminate  | 0.2                          | unknown (unclear role)                                |
| Phe94Leu                       | 2                                                 | 0                                                   | 2                                        | 0                                          | 0                                   | 0                                   | High           | 0.4                          |                                                       |
| Phe94Ser                       | 1                                                 | 0                                                   | 1                                        | 0                                          | 0                                   | 0                                   | High           | 0.2                          |                                                       |
| Tyr95Stop                      | 1                                                 | 0                                                   | 1                                        | 0                                          | 0                                   | 0                                   | High           | 0.2                          |                                                       |
| Del 96                         | 2                                                 | 0                                                   | 2                                        | 0                                          | 0                                   | 0                                   | High           | 0.4                          |                                                       |
| Ins 96                         | 3                                                 | 0                                                   | 3                                        | 0                                          | 0                                   | 0                                   | High           | 0.6                          |                                                       |
| Lys96Arg                       | 3                                                 | 1                                                   | 3                                        | 1                                          | 1                                   | 0                                   | Indeterminate  | 0.6                          | resistant                                             |
| Lys96Gln                       | 1                                                 | 0                                                   | 1                                        | 0                                          | 0                                   | 0                                   | Indeterminate  | 0.2                          | resistant                                             |
| Lys96Glu                       | 0                                                 | 1                                                   | 0                                        | 1                                          | 0                                   | 0                                   | Indeterminate  | 0.0                          | resistant                                             |
| Lys96Thr                       | 1                                                 | 0                                                   | 1                                        | 0                                          | 0                                   | 0                                   | Indeterminate  | 0.2                          | resistant                                             |
| Gly97Arg                       | 1                                                 | 0                                                   | 1                                        | 0                                          | 1                                   | 0                                   | High           | 0.2                          |                                                       |
| Gly97Asp                       | 4                                                 | 0                                                   | 4                                        | 0                                          | 3                                   | 0                                   | High           | 0.8                          |                                                       |
| Gly97Cys                       | 2                                                 | 0                                                   | 2                                        | 0                                          | 2                                   | 0                                   | Indeterminate  | 0.4                          | resistant                                             |
| Gly97Ser                       | 3                                                 | 0                                                   | 3                                        | 0                                          | 0                                   | 0                                   | High           | 0.6                          |                                                       |
| Del 100                        | 1                                                 | 0                                                   | 1                                        | 0                                          | 1                                   | 0                                   | High           | 0.2                          |                                                       |
| Ala102Pro                      | 1                                                 | 0                                                   | 1                                        | 0                                          | 0                                   | 0                                   | Indeterminate  | 0.2                          | resistant                                             |
| Ala102Thr                      | 1                                                 | 0                                                   | 1                                        | 0                                          | 0                                   | 0                                   | Indeterminate  | 0.2                          | resistant                                             |
| Ala102Val                      | 1                                                 | 1                                                   | 1                                        | 1                                          | 0                                   | 0                                   | Indeterminate  | 0.2                          | likely susceptible                                    |
| Tyr103Cys                      | 2                                                 | 0                                                   | 2                                        | 0                                          | 0                                   | 0                                   | Indeterminate  | 0.4                          | resistant                                             |
| Tyr103His                      | 1                                                 | 0                                                   | 1                                        | 0                                          | 0                                   | 0                                   | High           | 0.2                          |                                                       |
| Tyr103Ser                      | 1                                                 | 0                                                   | 1                                        | 0                                          | 0                                   | 0                                   | Indeterminate  | 0.2                          | likely resistant                                      |
| Ser104Arg                      | 4                                                 | 0                                                   | 4                                        | 0                                          | 0                                   | 0                                   | High           | 0.8                          |                                                       |
| Gly105Asp                      | 7                                                 | 0                                                   | 7                                        | 0                                          | 0                                   | 0                                   | Indeterminate  | 1.4                          | resistant                                             |
| Gly105Val                      | 1                                                 | 0                                                   | 1                                        | 0                                          | 0                                   | 0                                   | Indeterminate  | 0.2                          | unknown (unclear role)                                |
| Ins 105                        | 1                                                 | 0                                                   | 1                                        | 0                                          | 0                                   | 0                                   | High           | 0.2                          |                                                       |
| Phe106Leu                      | 1                                                 | 0                                                   | 1                                        | 0                                          | 0                                   | 0                                   | Indeterminate  | 0.2                          | unknown (unclear role)                                |
| Del 106                        | 4                                                 | 0                                                   | 4                                        | 0                                          | 0                                   | 0                                   | High           | 0.8                          |                                                       |
| Gly108Arg                      | 2                                                 | 0                                                   | 2                                        | 0                                          | 0                                   | 0                                   | High           | 0.4                          |                                                       |
| Gly108Glu                      | 1                                                 | 0                                                   | 1                                        | 0                                          | 0                                   | 0                                   | Indeterminate  | 0.2                          | likely resistant                                      |
| Del 114                        | 2                                                 | 0                                                   | 2                                        | 0                                          | 0                                   | 0                                   | High           | 0.4                          |                                                       |
| Ins 114                        | 1                                                 | 0                                                   | 1                                        | 0                                          | 0                                   | 0                                   | High           | 0.2                          |                                                       |
| Trp119Cys                      | 2                                                 | 0                                                   | 2                                        | 0                                          | 0                                   | 0                                   | Indeterminate  | 0.4                          | resistant                                             |
| Trp119Gly                      | 1                                                 | 0                                                   | 1                                        | 0                                          | 0                                   | 0                                   | Indeterminate  | 0.2                          | resistant                                             |
| Trp119Leu                      | 1                                                 | 0                                                   | 1                                        | 0                                          | 0                                   | 0                                   | Indeterminate  | 0.2                          | likely resistant                                      |
| Leu120Arg                      | 2                                                 | 0                                                   | 2                                        | 0                                          | 0                                   | 0                                   | Indeterminate  | 0.4                          | likely resistant                                      |
| Arg121Pro                      | 1                                                 | 0                                                   | 1                                        | 0                                          | 0                                   | 0                                   | Indeterminate  | 0.2                          | resistant                                             |
| Val125Phe                      | 2                                                 | 0                                                   | 2                                        | 0                                          | 0                                   | 0                                   | Indeterminate  | 0.4                          | resistant                                             |
| Del 127                        | 1                                                 | 0                                                   | 1                                        | 0                                          | 0                                   | 0                                   | High           | 0.2                          |                                                       |
| Val128Gly                      | 1                                                 | 0                                                   | 1                                        | 0                                          | 0                                   | 0                                   | High           | 0.2                          |                                                       |
| Asp129Asn                      | 1                                                 | 0                                                   | 1                                        | 0                                          | 0                                   | 0                                   | Indeterminate  | 0.2                          | unknown (unclear role)                                |
| Del 129*                       | 4                                                 | 0                                                   | 4                                        | 0                                          | 0                                   | 0                                   | Indeterminate  | 0.8                          | likely resistant                                      |
| Ins 130                        | 2                                                 | 0                                                   | 2                                        | 0                                          | 0                                   | 0                                   | High           | 0.4                          |                                                       |
| Val131Phe                      | 1                                                 | 0                                                   | 1                                        | 0                                          | 0                                   | 0                                   | Indeterminate  | 0.2                          | unknown (unclear role)                                |
| Ins 131                        | 6                                                 | 0                                                   | 6                                        | 0                                          | 0                                   | 0                                   | High           | 1.2                          |                                                       |
| Gly132Ala                      | 1                                                 | 1                                                   | 1                                        | 1                                          | 2                                   | 0                                   | Indeterminate  | 0.2                          | resistant                                             |
| Gly132Ser                      | 5                                                 | 0                                                   | 5                                        | 0                                          | 2                                   | 0                                   | Indeterminate  | 1.0                          | resistant                                             |
| Ile133Ser                      | 1                                                 | 0                                                   | 1                                        | 0                                          | 0                                   | 0                                   | Indeterminate  | 0.2                          | likely resistant                                      |
| Ile133Thr                      | 4                                                 | 0                                                   | 4                                        | 0                                          | 0                                   | 0                                   | Indeterminate  | 0.8                          | resistant                                             |
| Del 133                        | 1                                                 | 0                                                   | 1                                        | 0                                          | 0                                   | 0                                   | High           | 0.2                          |                                                       |
| Ala134Val                      | 7                                                 | 0                                                   | 7                                        | 0                                          | 0                                   | 0                                   | Indeterminate  | 1.4                          | resistant                                             |
| Thr135Pro                      | 1                                                 | 0                                                   | 1                                        | 0                                          | 1                                   | 0                                   | High           | 0.2                          |                                                       |
| Asp136Asn                      | 1                                                 | 0                                                   | 1                                        | 0                                          | 0                                   | 0                                   | Indeterminate  | 0.2                          | likely resistant                                      |
| Asp136Glu                      | 0                                                 | 1                                                   | 0                                        | 1                                          | 1                                   | 0                                   | Indeterminate  | 0.0                          | unknown (unclear role)                                |
| Asp136Val                      | 1                                                 | 0                                                   | 1                                        | 0                                          | 0                                   | 0                                   | Indeterminate  | 0.2                          | unknown (new mutation)                                |
| Ins 136                        | 1                                                 | 0                                                   | 1                                        | 0                                          | 0                                   | 0                                   | High           | 0.2                          |                                                       |
| His137Asn                      | 1                                                 | 0                                                   | 1                                        | 0                                          | 0                                   | 0                                   | Indeterminate  | 0.2                          | unknown (unclear role)                                |
| Ins 137                        | 1                                                 | 0                                                   | 1                                        | 0                                          | 0                                   | 0                                   | High           | 0.2                          |                                                       |
| Cys138Arg                      | 3                                                 | 0                                                   | 3                                        | 0                                          | 1                                   | 0                                   | Indeterminate  | 0.6                          | resistant                                             |
| Cys138Ser                      | 1                                                 | 0                                                   | 1                                        | 0                                          | 0                                   | 0                                   | Indeterminate  | 0.2                          | likely resistant                                      |
| Ins 138                        | 1                                                 | 0                                                   | 1                                        | 0                                          | 0                                   | 0                                   | High           | 0.2                          |                                                       |
| Val139Ala                      | 4                                                 | 0                                                   | 4                                        | 0                                          | 0                                   | 0                                   | Minimal        | 0.8                          |                                                       |
| Val139Gly                      | 1                                                 | 0                                                   | 1                                        | 0                                          | 1                                   | 0                                   | High           | 0.2                          |                                                       |
| Arg140Pro                      | 1                                                 | 0                                                   | 1                                        | 0                                          | 1                                   | 0                                   | Indeterminate  | 0.2                          | unknown (unclear role)                                |
| Gln141Pro                      | 6                                                 | 0                                                   | 6                                        | 0                                          | 0                                   | 0                                   | High           | 1.2                          |                                                       |
| Gln141Stop                     | 1                                                 | 0                                                   | 1                                        | 0                                          | 0                                   | 0                                   | High           | 0.2                          |                                                       |
| Thr142Ala                      | 5                                                 | 0                                                   | 3                                        | 2                                          | 0                                   | 0                                   | High           | 1.0                          |                                                       |
| Thr142Met                      | 2                                                 | 0                                                   | 2                                        | 0                                          | 0                                   | 0                                   | High           | 0.4                          |                                                       |
| Ala146Thr                      | 4                                                 | 0                                                   | 4                                        | 0                                          | 0                                   | 0                                   | Indeterminate  | 0.8                          | likely resistant                                      |
| Ins 150                        | 2                                                 | 0                                                   | 1                                        | 1                                          | 0                                   | 0                                   | High           | 0.4                          |                                                       |
| Leu151Ser                      | 5                                                 | 1                                                   | 5                                        | 1                                          | 4                                   | 0                                   | Indeterminate  | 1.0                          | resistant                                             |
| Ins 153                        | 3                                                 | 0                                                   | 3                                        | 0                                          | 3                                   | 0                                   | High           | 0.6                          |                                                       |
| Arg154Gly                      | 1                                                 | 1                                                   | 1                                        | 1                                          | 1                                   | 0                                   | Indeterminate  | 0.2                          | likely resistant                                      |
| Arg154Met                      | 1                                                 | 0                                                   | 1                                        | 0                                          | 0                                   | 0                                   | Indeterminate  | 0.2                          | unknown (unclear role)                                |
| Val155Ala                      | 1                                                 | 0                                                   | 1                                        | 0                                          | 0                                   | 0                                   | Indeterminate  | 0.2                          | likely resistant                                      |
| Val155Gly                      | 1                                                 | 0                                                   | 1                                        | 0                                          | 0                                   | 0                                   | High           | 0.2                          |                                                       |
| Val155Met                      | 4                                                 | 0                                                   | 4                                        | 0                                          | 0                                   | 0                                   | Indeterminate  | 0.8                          | likely resistant                                      |
| Ins 157                        | 1                                                 | 0                                                   | 1                                        | 0                                          | 0                                   | 0                                   | High           | 0.2                          |                                                       |
| Ins 159                        | 1                                                 | 0                                                   | 1                                        | 0                                          | 0                                   | 0                                   | High           | 0.2                          |                                                       |
| Leu159Arg                      | 1                                                 | 0                                                   | 1                                        | 0                                          | 0                                   | 0                                   | Indeterminate  | 0.2                          | resistant                                             |
| Thr160Pro                      | 6                                                 | 0                                                   | 6                                        | 0                                          | 0                                   | 0                                   | Indeterminate  | 1.2                          | resistant                                             |
| Gly162Asp                      | 1                                                 | 0                                                   | 1                                        | 0                                          | 0                                   | 0                                   | Indeterminate  | 0.2                          | resistant                                             |
| Val163Gly                      | 2                                                 | 0                                                   | 2                                        | 0                                          | 0                                   | 0                                   | Indeterminate  | 0.4                          | unknown (unclear role)                                |
| Ala165Thr                      | 0                                                 | 1                                                   | 0                                        | 1                                          | 1                                   | 0                                   | Indeterminate  | 0.0                          | unknown (new mutation)                                |
| Del 166                        | 1                                                 | 0                                                   | 1                                        | 0                                          | 0                                   | 0                                   | High           | 0.2                          |                                                       |
| Thr168Pro                      | 1                                                 | 0                                                   | 1                                        | 0                                          | 0                                   | 0                                   | Indeterminate  | 0.2                          | resistant                                             |
| Ala171Thr                      | 1                                                 | 0                                                   | 1                                        | 0                                          | 0                                   | 0                                   | Indeterminate  | 0.2                          | unknown (unclear role)                                |
| Leu172Pro                      | 6                                                 | 0                                                   | 6                                        | 0                                          | 1                                   | 0                                   | High           | 1.2                          |                                                       |
| Ins 173                        | 1                                                 | 0                                                   | 1                                        | 0                                          | 1                                   | 0                                   | High           | 0.2                          |                                                       |
| Met175Arg                      | 1                                                 | 0                                                   | 1                                        | 0                                          | 0                                   | 0                                   | Indeterminate  | 0.2                          | likely resistant                                      |
| Met175Ile                      | 0                                                 | 2                                                   | 0                                        | 2                                          | 2                                   | 0                                   | Indeterminate  | 0.0                          | resistant                                             |
| Met175Thr                      | 2                                                 | 0                                                   | 2                                        | 0                                          | 0                                   | 0                                   | Indeterminate  | 0.4                          | resistant                                             |
| Met175Val                      | 2                                                 | 0                                                   | 2                                        | 0                                          | 0                                   | 0                                   | High           | 0.4                          |                                                       |
| Thr177Pro                      | 3                                                 | 0                                                   | 3                                        | 0                                          | 0                                   | 0                                   | Indeterminate  | 0.6                          | unknown (unclear role)                                |
| Val180Phe                      | 1                                                 | 0                                                   | 1                                        | 0                                          | 0                                   | 0                                   | Indeterminate  | 0.2                          | resistant                                             |
| Stop187Arg                     | 1                                                 | 0                                                   | 1                                        | 0                                          | 0                                   | 0                                   | Indeterminate  | 0.2                          | resistant                                             |
| WT**                           | 63                                                | 2480                                                |                                          |                                            |                                     |                                     |                | 12.6                         |                                                       |
| <b>TOTAL</b>                   | <b>500</b>                                        | <b>2493</b>                                         |                                          |                                            |                                     |                                     |                | <b>100.0</b>                 |                                                       |

\* inframe insertion or deletion (not graded); Pzase: pyrazinamidase; Ins: insertion; Del: deletion.

\*\*WT: includes wild-type, silent mutations and phylogenetically informative variants

Supplement Table 8. Mutations in *gyrA* and *gyrB* genes associated with phenotypic resistance to fluoroquinolones.

| <i>gyrA</i> mutation<br>(codon position) | <i>gyrB</i> mutation<br>(codon position) | ofloxacin                                                  |                                                              |                                                |                                                  |                                    |                |                                  | moxifloxacin                                               |                                                              |                                                |                                                  |                                    |                |                                 |
|------------------------------------------|------------------------------------------|------------------------------------------------------------|--------------------------------------------------------------|------------------------------------------------|--------------------------------------------------|------------------------------------|----------------|----------------------------------|------------------------------------------------------------|--------------------------------------------------------------|------------------------------------------------|--------------------------------------------------|------------------------------------|----------------|---------------------------------|
|                                          |                                          | No. of isolates<br>with adjusted<br>resistant<br>phenotype | No. of isolates<br>with adjusted<br>susceptible<br>phenotype | No. of isolates<br>with resistant<br>phenotype | No. of isolates<br>with susceptible<br>phenotype | Medium used in<br>discordant cases | Grading system | % on total OFX-R<br>(total= 353) | No. of isolates<br>with adjusted<br>resistant<br>phenotype | No. of isolates<br>with adjusted<br>susceptible<br>phenotype | No. of isolates<br>with resistant<br>phenotype | No. of isolates<br>with susceptible<br>phenotype | Medium used in<br>discordant cases | Grading system | % on total MFX-R<br>(total=318) |
| Gly88Ala                                 | wt                                       | 1                                                          | 0                                                            | 1                                              | 0                                                |                                    | High           | 0.3                              | 1                                                          | 0                                                            | 1                                              | 0                                                |                                    | Indeterminate  | 0.3                             |
| Gly88Asp                                 | wt                                       | 1                                                          | 0                                                            | 1                                              | 0                                                |                                    | Indeterminate  | 0.3                              | 1                                                          | 0                                                            | 1                                              | 0                                                |                                    | Indeterminate  | 0.3                             |
| Gly88Cys                                 | wt                                       | 1                                                          | 0                                                            | 1                                              | 0                                                |                                    | High           | 0.3                              | 1                                                          | 0                                                            | 1                                              | 0                                                |                                    | Indeterminate  | 0.3                             |
| Gly88Cys + Asp94Gly                      | wt                                       | 1                                                          | 0                                                            | 1                                              | 0                                                |                                    | High           | 0.3                              | 1                                                          | 0                                                            | 1                                              | 0                                                |                                    | High           | 0.3                             |
| Asp89Asn                                 | wt                                       | 1                                                          | 1                                                            | 1                                              | 1                                                | 1 MGIT                             | Indeterminate  | 0.3                              | 0                                                          | 2                                                            | 0                                              | 2                                                | 2 MGIT                             | Indeterminate  | 0.0                             |
| Ala90Val                                 | wt                                       | 66                                                         | 0                                                            | 62                                             | 4                                                | 4 MGIT                             | High           | 18.7                             | 64                                                         | 0                                                            | 31                                             | 33                                               | 33 MGIT                            | High           | 20.1                            |
| Ala90Val + Asp94Ala                      | wt                                       | 2                                                          | 0                                                            | 2                                              | 0                                                |                                    | High           | 0.6                              | 2                                                          | 0                                                            | 2                                              | 0                                                |                                    | High           | 0.6                             |
| Ala90Val + Asp94Asn                      | wt                                       | 2                                                          | 0                                                            | 2                                              | 0                                                |                                    | High           | 0.6                              | 2                                                          | 0                                                            | 2                                              | 0                                                |                                    | High           | 0.6                             |
| Ala90Val + Asp94Gly                      | wt                                       | 9                                                          | 0                                                            | 9                                              | 0                                                |                                    | High           | 2.5                              | 9                                                          | 0                                                            | 9                                              | 0                                                |                                    | High           | 2.8                             |
| Ala90Val + Asp94Ser                      | wt                                       | 1                                                          | 0                                                            | 1                                              | 0                                                |                                    | High           | 0.3                              | 1                                                          | 0                                                            | 1                                              | 0                                                |                                    | High           | 0.3                             |
| Ala90Val + Asp94Tyr                      | wt                                       | 1                                                          | 0                                                            | 1                                              | 0                                                |                                    | High           | 0.3                              | 1                                                          | 0                                                            | 1                                              | 0                                                |                                    | High           | 0.3                             |
| Ala90Val + Ser91Pro                      | wt                                       | 3                                                          | 0                                                            | 3                                              | 0                                                |                                    | High           | 0.8                              | 3                                                          | 0                                                            | 2                                              | 1                                                | 1 MGIT                             | High           | 0.9                             |
| Ser91Pro                                 | wt                                       | 15                                                         | 0                                                            | 14                                             | 1                                                | 1 LJ                               | High           | 4.2                              | 15                                                         | 0                                                            | 9                                              | 6                                                | 6 MGIT                             | High           | 4.7                             |
| Asp94Ala                                 | wt                                       | 21                                                         | 0                                                            | 18                                             | 3                                                | 1 LJ, 2 MGIT                       | High           | 5.9                              | 18                                                         | 0                                                            | 9                                              | 9                                                | 9 MGIT                             | High           | 5.7                             |
| Asp94Asn                                 | wt                                       | 26                                                         | 0                                                            | 26                                             | 0                                                |                                    | High           | 7.4                              | 26                                                         | 0                                                            | 26                                             | 0                                                |                                    | High           | 8.2                             |
| Asp94Gly                                 | wt                                       | 128                                                        | 0                                                            | 125                                            | 3                                                | 1 LJ, 2 MGIT                       | High           | 36.3                             | 122                                                        | 0                                                            | 114                                            | 8                                                | 8 MGIT                             | High           | 38.4                            |
| Asp94His                                 | wt                                       | 2                                                          | 0                                                            | 2                                              | 0                                                |                                    | High           | 0.6                              | 2                                                          | 0                                                            | 2                                              | 0                                                |                                    | Indeterminate  | 0.6                             |
| Asp94Tyr                                 | wt                                       | 8                                                          | 0                                                            | 7                                              | 1                                                | 1 MGIT                             | High           | 2.3                              | 8                                                          | 0                                                            | 7                                              | 1                                                | 1 MGIT                             | High           | 2.5                             |
| wt                                       | Arg446Cys*                               | 1                                                          | 1                                                            | 1                                              | 1                                                | 1 MGIT                             | Indeterminate  | 0.3                              | 0                                                          | 2                                                            | 0                                              | 2                                                | 2 MGIT                             | Indeterminate  | 0.0                             |
| wt                                       | Asp461Asn                                | 3                                                          | 0                                                            | 3                                              | 0                                                |                                    | Indeterminate  | 0.8                              | 2                                                          | 1                                                            | 2                                              | 1                                                | 1 MGIT                             | Indeterminate  | 0.6                             |
| wt                                       | Asp461His                                | 1                                                          | 0                                                            | 1                                              | 0                                                |                                    | Indeterminate  | 0.3                              | 0                                                          | 1                                                            | 0                                              | 1                                                | 1 MGIT                             | Indeterminate  | 0.0                             |
| wt                                       | Ala467Thr                                | 1                                                          | 0                                                            | 1                                              | 0                                                |                                    | Indeterminate  | 0.3                              | 0                                                          | 1                                                            | 0                                              | 1                                                | 1 MGIT                             | Indeterminate  | 0.0                             |
| wt                                       | Asn499Thr                                | 0                                                          | 1                                                            | 0                                              | 1                                                | 1 MGIT                             | Indeterminate  | 0.0                              | 0                                                          | 1                                                            | 0                                              | 1                                                | 1 MGIT                             | Indeterminate  | 0.0                             |
| wt                                       | Thr500Asn                                | 2                                                          | 2                                                            | 2                                              | 2                                                | 2 MGIT                             | Indeterminate  | 0.6                              | 1                                                          | 3                                                            | 1                                              | 3                                                | 3 MGIT                             | Indeterminate  | 0.3                             |
| wt                                       | Glu501Asp                                | 2                                                          | 2                                                            | 2                                              | 2                                                | 1 LJ, 1 MGIT                       | Indeterminate  | 0.6                              | 3                                                          | 1                                                            | 3                                              | 1                                                | 1 MGIT                             | Indeterminate  | 0.9                             |
| wt                                       | Ala504Thr*                               | 0                                                          | 1                                                            | 0                                              | 1                                                | 1 MGIT                             | Indeterminate  | 0.0                              | 0                                                          | 1                                                            | 0                                              | 1                                                | 1 MGIT                             | Indeterminate  | 0.0                             |
| Ala90Val                                 | Glu501Asp                                | 1                                                          | 0                                                            | 1                                              | 0                                                |                                    | High           | 0.3                              | 1                                                          | 0                                                            | 1                                              | 0                                                |                                    | High           | 0.3                             |
| Asp94Ala                                 | Asp461Ala                                | 1                                                          | 0                                                            | 1                                              | 0                                                |                                    | High           | 0.3                              | 1                                                          | 0                                                            | 1                                              | 0                                                |                                    | High           | 0.3                             |
| Asp94Ala                                 | Asn499Thr                                | 1                                                          | 0                                                            | 1                                              | 0                                                |                                    | High           | 0.3                              | 1                                                          | 0                                                            | 0                                              | 1                                                | 1 MGIT                             | High           | 0.3                             |
| Asp94Asn                                 | Glu501Asp                                | 1                                                          | 0                                                            | 1                                              | 0                                                |                                    | High           | 0.3                              | 1                                                          | 0                                                            | 1                                              | 0                                                |                                    | High           | 0.3                             |
| Asp94Tyr                                 | Asp461Asn                                | 1                                                          | 0                                                            | 1                                              | 0                                                |                                    | High           | 0.3                              | 1                                                          | 0                                                            | 1                                              | 0                                                |                                    | High           | 0.3                             |
| Asp94Gly                                 | Ala504Val*                               | 1                                                          | 0                                                            | 1                                              | 0                                                |                                    | High           | 0.3                              | 1                                                          | 0                                                            | 1                                              | 0                                                |                                    | High           | 0.3                             |
| Asp94Gly                                 | Thr500Pro                                | 1                                                          | 0                                                            | 1                                              | 0                                                |                                    | High           | 0.3                              | 1                                                          | 0                                                            | 1                                              | 0                                                |                                    | High           | 0.3                             |
| WT**                                     | WT**                                     | 47                                                         | 4749                                                         |                                                |                                                  |                                    |                | 13.3                             | 28                                                         | 4462                                                         |                                                |                                                  |                                    |                | 8.8                             |
| <b>TOTAL</b>                             |                                          | <b>353</b>                                                 | <b>4757</b>                                                  |                                                |                                                  |                                    |                | <b>100.0</b>                     | <b>318</b>                                                 | <b>4475</b>                                                  |                                                |                                                  |                                    |                | <b>100.0</b>                    |

\* mutations outside Quinolone Resistance-Determining Region (QRDR); OFX: ofloxacin; MFX: moxifloxacin.

\*\*WT: includes wild-type, silent mutations and phylogenetically informative variants

Supplement Table 9. Mutations in *rrs* and *eis* genes associated with phenotypic resistance to injectable agents: kanamycin, amikacin, capreomycin.

| kanamycin           |                     |                                                   |                                                     |                                          |                                            |                                 |                |                              |
|---------------------|---------------------|---------------------------------------------------|-----------------------------------------------------|------------------------------------------|--------------------------------------------|---------------------------------|----------------|------------------------------|
| <i>rrs</i> mutation | <i>eis</i> mutation | No. of isolates with adjusted resistant phenotype | No. of isolates with adjusted susceptible phenotype | No. of isolates with resistant phenotype | No. of isolates with susceptible phenotype | Medium used in discordant cases | Grading system | % on total KAN-R (total=191) |
| a1401g              | wt                  | 81                                                | 0                                                   | 80                                       | 1                                          | 1 MGIT                          | High           | 42.4                         |
| c1402t              | wt                  | 0                                                 | 0                                                   | 0                                        | 0                                          |                                 |                | 0.0                          |
| wt                  | g-37t               | 18                                                | 0                                                   | 18                                       | 0                                          |                                 | Indeterminate  | 9.4                          |
| wt                  | c-14t               | 15                                                | 0                                                   | 11                                       | 4                                          | 1 LJ, 3 MGIT                    | High           | 7.9                          |
| wt                  | c-12t               | 42                                                | 0                                                   | 14                                       | 28                                         | 9 LJ, 19 MGIT                   | Indeterminate  | 22.0                         |
| wt                  | g-10a               | 20                                                | 0                                                   | 9                                        | 11                                         | 8 LJ, 3 MGIT                    | High           | 10.5                         |
| wt                  | g-10c               | 1                                                 | 0                                                   | 1                                        | 0                                          |                                 | Indeterminate  | 0.5                          |
| wt                  | c-8a                | 0                                                 | 3                                                   | 0                                        | 3                                          | 3 LJ                            | Indeterminate  | 0.0                          |
| wt                  | Del -8              | 5                                                 | 0                                                   | 5                                        | 0                                          |                                 | Indeterminate  | 2.6                          |
| wt                  | Del -7              | 1                                                 | 0                                                   | 1                                        | 0                                          |                                 | Indeterminate  | 0.5                          |
| a1401g              | c-12t               | 1                                                 | 0                                                   | 1                                        | 0                                          |                                 | High           | 0.5                          |
| a1401g              | g-10c               | 1                                                 | 0                                                   | 1                                        | 0                                          |                                 | High           | 0.5                          |
| WT**                | WT**                | 6                                                 | 468                                                 |                                          |                                            |                                 |                | 3.1                          |
|                     |                     | <b>191</b>                                        | <b>471</b>                                          |                                          |                                            |                                 |                | <b>100.0</b>                 |

  

| amikacin            |                     |                                                   |                                                     |                                          |                                            |                                 |                |                              |
|---------------------|---------------------|---------------------------------------------------|-----------------------------------------------------|------------------------------------------|--------------------------------------------|---------------------------------|----------------|------------------------------|
| <i>rrs</i> mutation | <i>eis</i> mutation | No. of isolates with adjusted resistant phenotype | No. of isolates with adjusted susceptible phenotype | No. of isolates with resistant phenotype | No. of isolates with susceptible phenotype | Medium used in discordant cases | Grading system | % on total AMK-R (total=124) |
| a1401g              | wt                  | 113                                               | 0                                                   | 108                                      | 5                                          | 3 LJ, 2 MGIT                    | High           | 91.1                         |
| c1402t              | wt                  | 0                                                 | 1                                                   | 0                                        | 1                                          | 1 MGIT                          | Indeterminate  | 0.0                          |
| WT**                | WT**                | 11                                                | 565                                                 |                                          |                                            |                                 |                | 8.9                          |
|                     |                     | <b>124</b>                                        | <b>566</b>                                          |                                          |                                            |                                 |                | <b>100.0</b>                 |

  

| capreomycin         |                     |                                                   |                                                     |                                          |                                            |                                 |                |                              |
|---------------------|---------------------|---------------------------------------------------|-----------------------------------------------------|------------------------------------------|--------------------------------------------|---------------------------------|----------------|------------------------------|
| <i>rrs</i> mutation | <i>eis</i> mutation | No. of isolates with adjusted resistant phenotype | No. of isolates with adjusted susceptible phenotype | No. of isolates with resistant phenotype | No. of isolates with susceptible phenotype | Medium used in discordant cases | Grading system | % on total CAP-R (total=136) |
| a1401g              | wt                  | 115                                               | 0                                                   | 92                                       | 23                                         | 20 LJ, 3 MGIT                   | High           | 84.6                         |
| c1402t              | wt                  | 1                                                 | 0                                                   | 1                                        | 0                                          |                                 | High           | 0.7                          |
| WT**                | WT**                | 20                                                | 628                                                 |                                          |                                            |                                 |                | 14.7                         |
|                     |                     | <b>136</b>                                        | <b>628</b>                                          |                                          |                                            |                                 |                | <b>100.0</b>                 |

Del: deletion; KAN: kanamycin; AMK: amikacin; CAP: capreomycin.

\*\*WT: includes wild-type, silent mutations and phylogenetically informative variants
